# Supplementary material
Source: PubMed Central journal article supplement (PMC5912474)
Supplement: supp_RA117.000406_133098_1_supp_77232_p47wst.pdf [file supp_RA117.000406_133098_1_supp_77232_p47wst.pdf]

Post-translational modification of type IV collagen with 3-hydroxyproline affects its interactions with glycoprotein VI and nidogens 1 and 2

Nathan T. Montgomery<sup>1,2</sup>, Keith D. Zientek<sup>1</sup>, Elena N. Pokidysheva<sup>3</sup>, Hans Peter Bächinger<sup>1,2</sup>

**Supplemental File**

**Supplemental Methods**

*Karyotyping* - All karyotyping procedures and interpretation were performed by the Oregon Health and Science University Research Cytogenetics Laboratory. Confluent cells were exposed to colcemid (0.05 ug / mL) for 2 hours to arrest cells at metaphase and then were harvested. Cells were incubated in 75 mM KCl, 5% Fetal Bovine Serum for 10 minutes, then fixed in 3:1 methanol acetic acid. The cell suspension was dropped onto alcohol cleaned microscope slides and baked at 90 °C for 20 minutes. After cooling, the slides were trypsinized for 45 seconds, incubated with Wright stain for 80 seconds, rinsed with diH<sub>2</sub>O and dried. Chromosomes were imaged using bright field microscopy, and analyzed using Cytovision software (Applied Imaging, San Jose, CA). Karyotype designations were assigned according to MGI rules mouse nomenclature of chromosome abnormalities.

*Circular Dichroism* - Measurements were all made on an AVIV CD Spectrometer Model 202, using AVIV CDS.EXE Version 2.88 instrument control and data acquisition software running on a Windows XP computer. Samples were placed into 1 mm path length quartz cuvettes (Starna Cells, 21-Q-1). Samples were dialyzed into 10 mM acetic acid. Wavelength scans were conducted over a range from 200 to 300 nm with 0.5 nm steps, 60 second averaging per step and 1.0 nm bandwidth at 25 °C. Temperature scans observed CD signal at 220 nm (1.0 nm wavelength) and were conducted over a 25 to 55 °C range (High concentration, Figure 2a.) or a 4 to 65 °C range (Figure 2b). The temperature was increased at a rate of 10 °C / hour (36 second averaging time). Sample concentrations for WT and 6A6 (P3H2 KO) PFHR-9 type IV collagen were obtained by amino acid analysis (see Methods) and normalized for wavelength and temperature scans, used to obtain molar ellipticities. Melting curves were obtained from transformation of temperature scan data using a method found in Persikov et al. 2004 (1 ).

Supplemental Table 1. Amino acid composition of type IV collagen samples from PFHR-9 cells.

| Amino Acid | Experimental Composition WT | Experimental Composition P3H2 KO | Amino Acids Per Triple Helix |
|------------|-----------------------------|----------------------------------|------------------------------|
| D + N      | 268.9                       | 259.9                            | 244                          |
| T          | 154.8                       | 156.0                            | 148                          |
| S          | 216.1                       | 212.8                            | 225                          |
| E + Q      | 491.8                       | 448                              | 432                          |
| A          | 170.8                       | 179.4                            | 164                          |
| V          | 175.7                       | 176.9                            | 170                          |
| M          | 94.1                        | 95.7                             | 93                           |
| I          | 142.4                       | 143.5                            | 143                          |
| L          | 305.5                       | 317                              | 253                          |
| Y          | 53.2                        | 59.3                             | 52                           |
| F          | 161.0                       | 172                              | 156                          |
| H          | 57.5                        | 56.7                             | 56                           |
| R          | 166.0                       | 160.3                            | 157                          |

**Supplemental Table 1.** *Amino acid composition of type IV collagen samples from PFHR-9 cells.*

Experimental concentration of amino acids was derived from peak integration and the average of three runs. Amino acid compositions are shown for D + N and E + Q, because the amide side chains residues (N or Q) are converted to the corresponding carboxylic acids (D or E) during acid hydrolysis. The predicted amino acid composition is derived from the amino acid sequence of a hetero trimeric mouse type IV collagen triple helix (using UniprotKB entries P02463-1 and P08122-1), lacking the N-terminal propeptide.

## Supplemental Figures

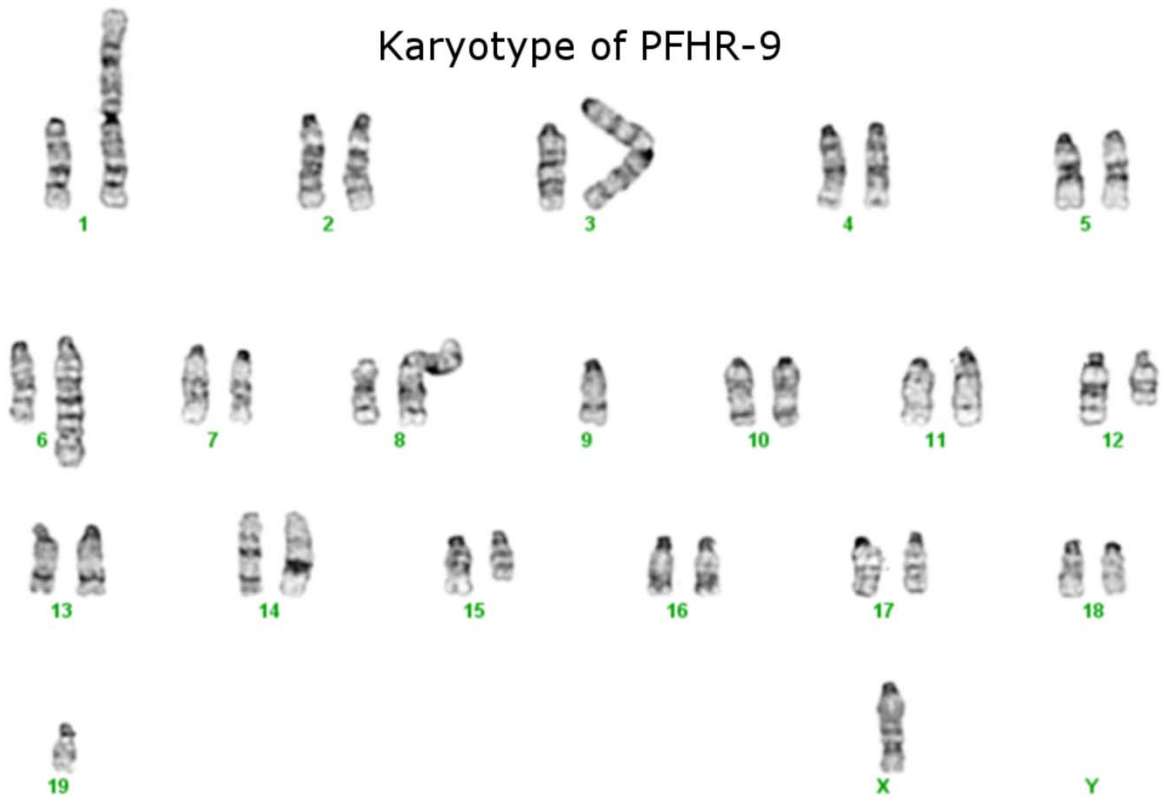

**Supplemental Figure 1.** *Karyotype of PFHR-9, an Aneuploid Mouse Teratocarcinoma Derived Cell Line.* PFHR-9 is diploid for chromosome 16 (containing *LEPREL1*, the gene of interest for KO), effectively triploid for chromosome 8 (containing *COL4A1* and *COL4A2*), and is missing a Y chromosome though the original tumor cells were from a male mouse. Detailed interpretation of karyotypes is found in this supplement and karyotyping was performed by the Oregon Health & Science University Cytogenetics Research Core.

## OHSU Research Cytogenetics Laboratory Karotyping Report for PFHR-9

Chromosome Results: **Abnormal**

Karyotype:

**37,X,Rb(1.der(1)T(1H5;3H2)),Add(3G),Dic(3;9)(9A1→9B::9D→9F2::9F2→9B::3A1→3H4),Der(6)T(6G3;19B)Is(?;6D),+8,Rb(8.8),Del(12E-12F2),InDp(14D2;14E2),-19[cp10]/37,X,sl,T(14E4;15D3)[cp7]/37,X,sl,-Rb(1.der(1)T(1H5;3H2)),+Rb(der(1)T(1H5;3H2).der(1)T(1H5;3H2)),+14,-InDp(14D2;14E2)[cp3]**

Interpretation and Comments:

All twenty metaphase cells examined comprised three related, complex abnormal clones, all with 37 chromosomes and a single sex chromosome. The stemline contains seven structural abnormalities:

- 1) a robertsonian translocation (fusion at centromeres) involving an intact copy of chromosome 1 and a derivative chromosome 1
- 2) a chromosome 3 with additional material of unknown origin attached at band G
- 3) a dicentric chromosome involving chromosome 3 and chromosome 9 (with duplicated and deleted material on chromosome 9)
- 4) a derivative chromosome 6 from a translocation with chromosome 19 and an insertion of material of unknown origin at band D
- 5) a robertsonian translocation involving two copies of chromosome 8 (in addition to a free copy of chromosome 8, thus, essentially trisomy 8)
- 6) a deletion on chromosome 12
- 7) an inverted duplication on chromosome 14

Two sidelines were present in this cell line as well. Seven cells had a translocation between chromosome 14 and chromosome 15. Three other cells lost the inverted and duplicated chromosome 14 while gaining a normal chromosome 14, and replaced the robertsonian translocation between chromosome 1 and derivative chromosome 1 with one between two copies of the derivative chromosome 1.

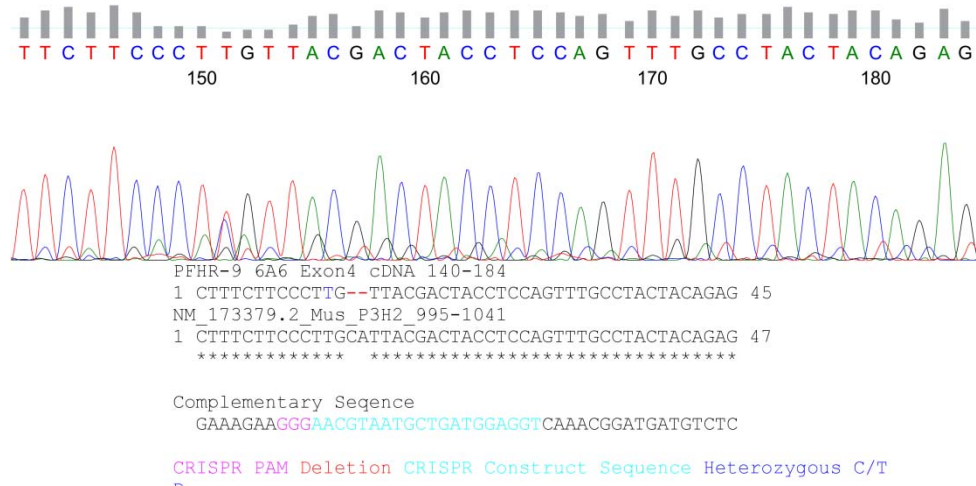

**Supplemental Figure 2.** Sequencing of exon 4 of *PFHR-9 6A6 LEPREL1* gene. An electropherogram of the region surrounding the disrupted portion of *LEPREL1* (coding for P3H2) exon 4 is shown. The location of the deletion (red), and location of a heterozygous base (C/T) (blue) are color coded. The complementary sequence used to generate the CRISPR construct (teal) and the corresponding CRISPR PAM sequence (purple) are also color coded.

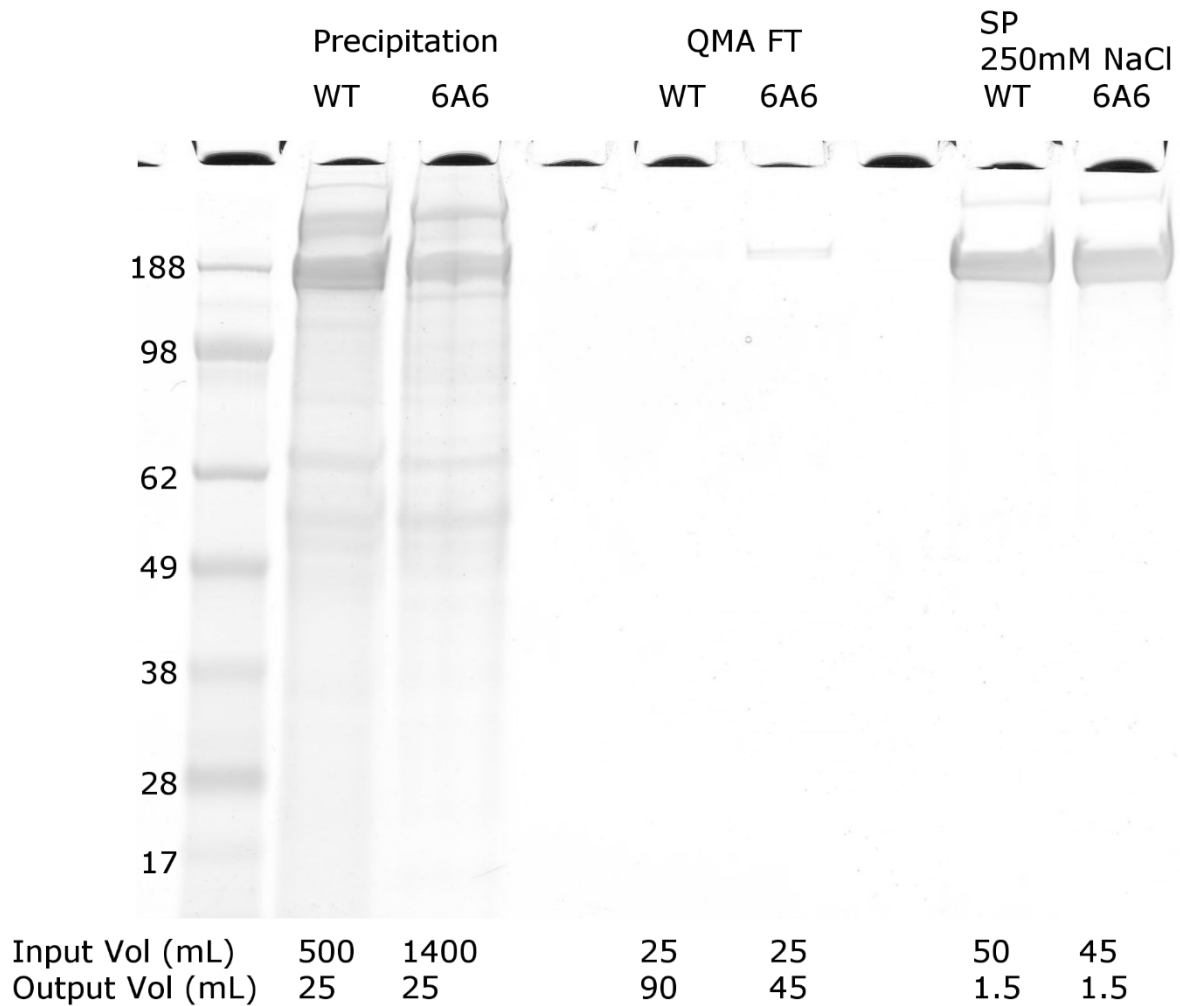

**Supplemental Figure 3.** Summary Gel of Purification of type IV collagen from PFHR-9 Cell Culture Media from WT and 6A6 (P3H2 KO) Cells. Input volume in precipitation step is volume of thawed PFHR-9 culture media and output volume is the resuspension volume of the ammonium sulfate precipitate. QMA flow through input volume is the input volume of clarified resuspended ammonium sulfate precipitate and output volume is the volume of pooled flow-thru from the QMA column. SP 250 mM NaCl input volume is the volume of pooled QMA flow-thru loaded onto the SP Sepharose column, output volume is the pooled volume from the most concentrated fractions eluted at 250 mM NaCl. Equal volumes of sample were loaded onto each lane of a 4-12 % BOLT MES gel.

|              |       |                                                       |     |
|--------------|-------|-------------------------------------------------------|-----|
| 1            |       |                                                       | 50  |
| Human_Col4A1 | (1)   | MGPRLSVWLLLLPAALLLHEEHSRAAAKGGCAGSGCGKCDCHGVKQKGE     |     |
| mouse_Col4A1 | (1)   | MGPRLSVWLLLLFAALLLHEERSRAAAKGDCCGSGCGKCDCHGVKQKGE     |     |
|              |       | 51                                                    | 100 |
| Human_Col4A1 | (51)  | RGLPGLQGVIGFPGMQGPEGPQGGPPGQKGDTEGEPGLPGTKGTRGPPGASG  |     |
| mouse_Col4A1 | (51)  | RGLPGLQGVIGFPGMQGPEGPHGPPGQKGDAGEPGLPGTKGTRGPPGAAG    |     |
|              |       | 101                                                   | 150 |
| Human_Col4A1 | (101) | YPGNPGLPGIPGQDGGPPGPPGIPGCNGTKGERGRLGPPGLPGFAGNPGPP   |     |
| mouse_Col4A1 | (101) | YPGNPGLPGIPGQDGGPPGPPGIPGCNGTKGERGRLGPPGLPGFSGNPGPP   |     |
|              |       | 151                                                   | 200 |
| Human_Col4A1 | (151) | GLPGMKGDPGEILGHVPGMLLKGERGFPGIPGTPGPPGLPGLQGPVGGPPG   |     |
| mouse_Col4A1 | (151) | GLPGMKGDPGEILGHVPGTLLKGERGFPGIPGMPGSPGLPGLQGPVGGPPG   |     |
|              |       | 201                                                   | 250 |
| Human_Col4A1 | (201) | FTGPPGPPGPPGPPGPEKQMGLSFQGPKGDKDQGVSGPPGVPGQAQVQE     |     |
| mouse_Col4A1 | (201) | FTGPPGPPGPPGPPGPEKQMGSSFQGPKGDKGEQGVSGPPGVPGQAQVKE    |     |
|              |       | 251                                                   | 300 |
| Human_Col4A1 | (251) | KGDFATKGEKGQKGEPPGFQGMVGVGEKGEPPGKPGPRGKPGKDGDKGEKGS  |     |
| mouse_Col4A1 | (251) | KGDFAPTGEKGQKGEPPGFVPGVGEKGEPPGKQGPGRGKPGKDGDKGERGS   |     |
|              |       | 301                                                   | 350 |
| Human_Col4A1 | (301) | PGFPGEPPGYPLIGRQGPQGEKGEAGPPGPPGIVIGTGPLGEKGERGYPG    |     |
| mouse_Col4A1 | (301) | PGIPGDSGYPLPGRQGPQGEKGEAGLPGPPGTIVIGTMPLGEKGDRTGYPG   |     |
|              |       | 351                                                   | 400 |
| Human_Col4A1 | (351) | TPGPRGEPGPKGFPLPGQPGPPGLVPPGQAGAPGFPPGERGEKGDRTGFPG   |     |
| mouse_Col4A1 | (351) | APGLRGEPPGPKGFPGTTPGQPGPPGFPTPGQAGAPGFPPGERGEKGDQGFPG |     |
|              |       | 401                                                   | 450 |
| Human_Col4A1 | (401) | TSLPGPSGRDGLPGPPGSPGPPGQPGYTNGIVECQPGPPGDQGGPPGIPGQ   |     |
| mouse_Col4A1 | (401) | VSLPGPSGRDGAAPGPPGPPGPPGQPGHTNGIVECQPGPPGDQGGPPGTTPGQ |     |
|              |       | 451                                                   | 500 |
| Human_Col4A1 | (451) | PGFIGEIGEKQKGESCLICDIDGYRGPPGPPGPPGEGIFGPPGQPGAKGDR   |     |
| mouse_Col4A1 | (451) | PGLTGEVQKQKGESCLACDTEGLRGPVPPGPPGPPGEGIFGPPGQPGAKGDR  |     |
|              |       | 501                                                   | 550 |
| Human_Col4A1 | (501) | GLPGRDGVAGVPPGQGTPLIGQPGAKGEPGEFYFDLRLKGDKDPGFPPG     |     |
| mouse_Col4A1 | (501) | GLPGRDGLEGLPVPQGSPLIGQPGAKGEPGEIFFDMRLKGDKDPGFPPG     |     |
|              |       | 551                                                   | 600 |
| Human_Col4A1 | (551) | QPGMTGRAGSPGRDGHPLPGPKGSPGVSGLKGERGPPGGVGFPPGSRGDT    |     |
| mouse_Col4A1 | (551) | QPGMPGRAGTTPGRDGHPLPGPKGSPGSIGLKGERGPPGGVGFPPGSRGDI   |     |
|              |       | 601                                                   | 650 |
| Human_Col4A1 | (601) | GPPGPPGYGAPGIGDKQAGFPGGPGSPGLPGPKGEPGKIVPLPGPPGA      |     |
| mouse_Col4A1 | (601) | GPPGPPGVGPIGPVGEKQAGFPGGPGSPGLPGPKGEPGKVVPLPGPPGA     |     |
|              |       | 651                                                   | 700 |
| Human_Col4A1 | (651) | EGLPGSPGFPPGQDGRGFPGTTPRPLPGEKGAVGQPGIGFPPGPPGPKGV    |     |
| mouse_Col4A1 | (651) | AGLPGSPGFPPGQDGRGFPGTTPRPLPGEKGAVGQPGIGFPPGLPGPKGV    |     |
|              |       | 701                                                   | 750 |
| Human_Col4A1 | (701) | DGLPGDMGPPGTPGRPGFNGLPGNPGVQGGKGEPPVGLPGLKGLPGLPGI    |     |
| mouse_Col4A1 | (701) | DGLPGEIIGRPGSPGRPGFNGLPGNPGVQGGKGEPPVGLPGLKGLPGLPGI   |     |
|              |       | 751                                                   | 800 |
| Human_Col4A1 | (751) | PGTPGEKGSIGVPGVPGEHGAIGPPGLQGIRGEPGPPGLPGSVGSPGVPG    |     |
| mouse_Col4A1 | (751) | PGTPGEKGSIGGPGVPGEQGLTGPPGLQGIRGDPGPPGVQGPAGPPGVPG    |     |
|              |       | 801                                                   | 850 |
| Human_Col4A1 | (801) | IGPPGARPPGGQGGPPGLSGPPGKKEKGFPGFPGLDMPGPKGDKGAQGL     |     |
| mouse_Col4A1 | (801) | IGPPGAMPPGGQGGPPGSSGPPGKKEKGFPGFPGLDMPGPKGDKGSQGL     |     |
|              |       | 851                                                   | 900 |
| Human_Col4A1 | (851) | PGITGQSGPLPGLPGQAGPIPGFPGSKGEMGVMGTPGQPGSPGPPVAGP     |     |
| mouse_Col4A1 | (851) | PGLTGQSGPLPGLPGQGTTPGVPGFPGSKGEMGVMGTPGQPGSPGPPAGTPG  |     |
|              |       | 901                                                   | 950 |
| Human_Col4A1 | (901) | LPGEKGDHGFPGSSGPRGDPGLKGDKGDVGLPGKPGSMDKVDMSGSMKQK    |     |
| mouse_Col4A1 | (901) | LPGEKGDHGLPGSSGPRGDPGFKGDKGDVGLPGMPGSMHVDMSGSMKQK     |     |

|              |        |                                                                                                     |  |      |
|--------------|--------|-----------------------------------------------------------------------------------------------------|--|------|
|              |        | 951                                                                                                 |  | 1000 |
| Human_Col4A1 | (951)  | GDQGEKGGQIGP I G E K G S R G D P G T P G V P G K D G Q A G Q P G Q P G P K G D P G I S G T          |  |      |
| mouse_Col4A1 | (951)  | GDQGEKGGQIGP T G D K G S R G D P G T P G V P G K D G Q A G H P G Q P G P K G D P G L S G T          |  |      |
|              |        | 1001                                                                                                |  | 1050 |
| Human_Col4A1 | (1001) | P G A P G L P G P K G S V G G M G L P G T P G E K G V P G I P G P Q G S P G L P G D K G A K G E K G |  |      |
| mouse_Col4A1 | (1001) | P G S P G L P G P K G S V G G M G L P G S P G E K G V P G I P G S Q G V P G S P G E K G A K G E K G |  |      |
|              |        | 1051                                                                                                |  | 1100 |
| Human_Col4A1 | (1051) | Q A G P P G I G I P G L R G E K G D Q G I A G F P G S P G E K G E K G S I G I P G M P G S P G L K G |  |      |
| mouse_Col4A1 | (1051) | Q S G L P G I G I P G R P G D K G D Q G L A G F P G S P G E K G E K G S A G T P G M P G S P G P R G |  |      |
|              |        | 1101                                                                                                |  | 1150 |
| Human_Col4A1 | (1101) | S P G S V G Y P G S P G L P G E K G D K G L P G L D G I P G V K G E A G L P G T P G T P G P A G Q K |  |      |
| mouse_Col4A1 | (1101) | S P G N I G H P G S P G L P G E K G D K G L P G L D G V P G V K G E A G L P G T P G T P G P A G Q K |  |      |
|              |        | 1151                                                                                                |  | 1200 |
| Human_Col4A1 | (1151) | G E P G S D G I P G S A G E K G E P G L P G R G F P G F P G A K G D K G S K G E V G F P G L A G S P |  |      |
| mouse_Col4A1 | (1151) | G E P G S D G I P G S A G E K G E Q G V P G R G F P G F P G S K G D K G S K G E V G F P G L A G S P |  |      |
|              |        | 1201                                                                                                |  | 1250 |
| Human_Col4A1 | (1201) | G I P G S K G E Q G F M G P P G P Q G Q P G L P G S P G H A T E G P K G D R G P Q G Q P G L P G L P |  |      |
| mouse_Col4A1 | (1201) | G I P G V K G E Q G F M G P P G P Q G Q P G L P G T P G H P V E G P K G D R G P Q G Q P G L P G H P |  |      |
|              |        | 1251                                                                                                |  | 1300 |
| Human_Col4A1 | (1251) | G P M G P P G L P G I D G V K G D K G N P G W P G A P G V P G P K G D P G F Q G M P G I G G S P G I |  |      |
| mouse_Col4A1 | (1251) | G P M G P P G F P G I N G P K G D K G N Q G W P G A P G V P G P K G D P G F Q G M P G I G G S P G I |  |      |
|              |        | 1301                                                                                                |  | 1350 |
| Human_Col4A1 | (1301) | T G S K G D M G P P G V P G F Q G P K G L P G L Q G I K G D Q G D Q G V P G A K G L P G P P G P P G |  |      |
| mouse_Col4A1 | (1301) | T G S K G D M G L P G V P G F Q G Q K G L P G L Q G V K G D Q G D Q G V P G P K G L Q G P P G P P G |  |      |
|              |        | 1351                                                                                                |  | 1400 |
| Human_Col4A1 | (1351) | P Y D I I K G E P G L P G P E G P P G L K G L Q G L P G P K G Q Q G V T G L V G I P G P P G I P G F |  |      |
| mouse_Col4A1 | (1351) | P Y D V I K G E P G L P G P E G P P G L K G L Q G P P G P K G Q Q G V T G S V G L P G P P G V P G F |  |      |
|              |        | 1401                                                                                                |  | 1450 |
| Human_Col4A1 | (1401) | D G A P G Q K G E M G P A G T P G P R G F P G P P G P D G L P G S M G P P G T P S V D H G F L V T R |  |      |
| mouse_Col4A1 | (1401) | D G A P G Q K G E T G P F G P P G P R G F P G P P G P D G L P G S M G P P G T P S V D H G F L V T R |  |      |
|              |        | 1451                                                                                                |  | 1500 |
| Human_Col4A1 | (1451) | H S Q T I D D P Q C P S G T K I L Y H G Y S L L Y V Q G N E R A H G Q D L G T A G S C L R K F S T M |  |      |
| mouse_Col4A1 | (1451) | H S Q T T D D P L C P P G T K I L Y H G Y S L L Y V Q G N E R A H G Q D L G T A G S C L R K F S T M |  |      |
|              |        | 1501                                                                                                |  | 1550 |
| Human_Col4A1 | (1501) | P F L F C N I N N V C N F A S R N D Y S Y W L S T P E P M P M S M A P I T G E N I R P F I S R C A V |  |      |
| mouse_Col4A1 | (1501) | P F L F C N I N N V C N F A S R N D Y S Y W L S T P E P M P M S M A P I S G D N I R P F I S R C A V |  |      |
|              |        | 1551                                                                                                |  | 1600 |
| Human_Col4A1 | (1551) | C E A P A M V M A V H S Q T I Q I P P C P S G W S S L W I G Y S F V M H T S A G A E G S G Q A L A S |  |      |
| mouse_Col4A1 | (1551) | C E A P A M V M A V H S Q T I Q I P Q C P N G W S S L W I G Y S F V M H T S A G A E G S G Q A L A S |  |      |
|              |        | 1601                                                                                                |  | 1650 |
| Human_Col4A1 | (1601) | P G S C L E E F R S A P F I E C H G R G T C N Y Y A N A Y S F W L A T I E R S E M F K K P T P S T L |  |      |
| mouse_Col4A1 | (1601) | P G S C L E E F R S A P F I E C H G R G T C N Y Y A N A Y S F W L A T I E R S E M F K K P T P S T L |  |      |
|              |        | 1651                                                                                                |  | 1669 |
| Human_Col4A1 | (1651) | K A G E L R T H V S R C Q V C M R R T                                                               |  |      |
| mouse_Col4A1 | (1651) | K A G E L R T H V S R C Q V C M R R T                                                               |  |      |

**Supplemental Figure 4.** Sequence alignment of mouse and human Type IV collagen  $\alpha 1$  chain. X-position prolines predicted to be 3-hydroxylated in mouse, based on the mass spectrometry data reported here, are highlighted in blue. Sequences with identity between mouse and human are highlighted in yellow, similar amino acids (i.e. I/L, T/S) are highlighted in green.



| 1            | 50    |                                                                                                                                                                                                                              |
|--------------|-------|------------------------------------------------------------------------------------------------------------------------------------------------------------------------------------------------------------------------------|
| human_Col4A2 | (1)   | MGRDQRAVAGPALRRWLLLGTVTVGF <del>LAQSVLAGVKKF</del> DVPCGGRDCSSG                                                                                                                                                              |
| mouse_Col4A2 | (1)   | MDRVRFKASGPPLRGWLLLATVTVGL <del>LAQSVLGGVKKL</del> DVPCGGRDCSSG                                                                                                                                                              |
|              |       | 51 100                                                                                                                                                                                                                       |
| human_Col4A2 | (51)  | CQCYPEKGGRGQPGPVGPGQYNGPPGLQGF <del>PGLQGRKGDKGERG</del> APGVTG                                                                                                                                                              |
| mouse_Col4A2 | (51)  | CQCYPEKGGARGQPGAVGPGQYNGP <del>PGLQGF</del> PGLQGRKGDKGERGVPGPTG                                                                                                                                                             |
|              |       | 101 150                                                                                                                                                                                                                      |
| human_Col4A2 | (101) | PKGDVGARGVSGFFGADGIPGHPGQGGPRGRPGYDGCNGTQGD <del>SGPQGP</del> P                                                                                                                                                              |
| mouse_Col4A2 | (101) | PKGDVGARGVSGFFGADGIPGHPGQGGPRGRPGYDGCNGTRGD <del>AGPQGP</del> S                                                                                                                                                              |
|              |       | 151 200                                                                                                                                                                                                                      |
| human_Col4A2 | (151) | GSEGF <del>TGPPGPGQPKGQKGE</del> PYALPKEERDRYRGEPEPEGLVGFQGP <del>PPGR</del>                                                                                                                                                 |
| mouse_Col4A2 | (151) | GSGGF <del>PGLPGPQPKGQKGE</del> PYALSKEERDKYRGEPEPEGLVGYQGP <del>PPGR</del>                                                                                                                                                  |
|              |       | 201 250                                                                                                                                                                                                                      |
| human_Col4A2 | (201) | PGHVGQMG <del>PVGAPGRPGPPGPKGQ</del> QGNRGLGFYGVKGEKGDVQ <del>PGP</del>                                                                                                                                                      |
| mouse_Col4A2 | (201) | PGPIGQMG <del>PMGAPGRPGPPGPKGQ</del> PNRGLGFYGVKGEKGDIG <del>QPGP</del>                                                                                                                                                      |
|              |       | 251 300                                                                                                                                                                                                                      |
| human_Col4A2 | (251) | NGIPSDTLHPIT <del>IAPT</del> GVTFHPDQYKGEKGS <del>E</del> EGEPGIRGI <del>ISL</del> KGEEGIMGF                                                                                                                                 |
| mouse_Col4A2 | (251) | NGIPSDIT--LVGPTT <del>STIHPDL</del> YKGEKGD <del>E</del> EGEQGIPGV <del>IS</del> KGEEGIMGF                                                                                                                                   |
|              |       | 301 350                                                                                                                                                                                                                      |
| human_Col4A2 | (301) | PGLRGYPGLS <del>GEKGS</del> SPGQKGS <del>RGLDGY</del> QGPDPGRGPKGEAGDP <del>GGP</del> LPA                                                                                                                                    |
| mouse_Col4A2 | (299) | PGIRGF <del>PGLDGEKGV</del> VGQKGS <del>RGLDGF</del> QGPSGPRGPKGERGE <del>QGP</del> PPSV                                                                                                                                     |
|              |       | 351 400                                                                                                                                                                                                                      |
| human_Col4A2 | (351) | YSPHPSLAKGARGDPGFPGA <del>QGE</del> PGSQ <del>GE</del> PGDPGLP <del>GGP</del> GLSIGDGD <del>QRR</del>                                                                                                                        |
| mouse_Col4A2 | (349) | YSPHPSLAKGARGDPGFQGAH <del>GE</del> PGSR <del>GE</del> PEPGTAG <del>PP</del> PSV <del>GE</del> DEDSMR                                                                                                                        |
|              |       | 401 450                                                                                                                                                                                                                      |
| human_Col4A2 | (401) | GLPGEMGPKGFI <del>DPG</del> IPALYGGPPGPDGKRGPPG <del>PGLP</del> GGP <del>GG</del> PDGFLF                                                                                                                                     |
| mouse_Col4A2 | (399) | GLPGEMGPKGFS <del>EPG</del> SPARYL <del>GPP</del> GADGRPGPQGV <del>PG</del> PAGPPG <del>PDG</del> FLF                                                                                                                        |
|              |       | 451 500                                                                                                                                                                                                                      |
| human_Col4A2 | (451) | GLKGAKGRAGFP <del>GLP</del> GS <del>PG</del> ARGPKG <del>WKGD</del> AGECRCTEGDEA <del>IKGL</del> PGLPG                                                                                                                       |
| mouse_Col4A2 | (449) | GLKGS <del>EGR</del> VGY <del>PG</del> PSGF <del>PG</del> TRGQK <del>GW</del> GEAGDC <del>CGQ</del> ---VIGGLPGLPG                                                                                                            |
|              |       | 501 550                                                                                                                                                                                                                      |
| human_Col4A2 | (501) | PKGFAGINGEP <del>GRK</del> GD <del>RD</del> PGQH <del>GLP</del> GF <del>PGL</del> KGV <del>PGNI</del> GAPGPKGAKGDS                                                                                                           |
| mouse_Col4A2 | (496) | PKGF <del>PGV</del> NGEL <del>GKK</del> GD <del>QD</del> PGLH <del>GI</del> PGF <del>PG</del> FKGAP <del>GVA</del> GAPGPKGIK <del>GD</del> S                                                                                 |
|              |       | 551 600                                                                                                                                                                                                                      |
| human_Col4A2 | (551) | RTITTKGERGQ <del>PGV</del> PGV <del>PG</del> MK <del>GDD</del> GS <del>PR</del> RD <del>GLD</del> GF <del>PGL</del> PG <del>PP</del> GD <del>G</del> IK <del>GP</del> P                                                      |
| mouse_Col4A2 | (546) | RTITTKGERGQ <del>PGI</del> PGV <del>HGM</del> K <del>GDD</del> GV <del>PR</del> RD <del>GLD</del> GF <del>PGL</del> PG <del>PP</del> GD <del>G</del> IK <del>GP</del> P                                                      |
|              |       | 601 650                                                                                                                                                                                                                      |
| human_Col4A2 | (601) | GD <del>PGY</del> PGIP <del>GT</del> KGT <del>PG</del> EM <del>GP</del> PG <del>LGL</del> P <del>LK</del> Q <del>R</del> GF <del>PG</del> DAG <del>LPG</del> PP <del>GF</del> L <del>GP</del> P                              |
| mouse_Col4A2 | (596) | GDAGL <del>PGV</del> PGT <del>KGF</del> PGDI <del>PPP</del> QGL <del>PG</del> PK <del>GER</del> GF <del>PG</del> DAG <del>LPG</del> PP <del>GF</del> PG <del>PP</del>                                                        |
|              |       | 651 700                                                                                                                                                                                                                      |
| human_Col4A2 | (651) | GPAGTPGQID <del>CDT</del> DV <del>KRA</del> VGG <del>DR</del> QEAIQ <del>PG</del> CI <del>GG</del> PK <del>GLP</del> GL <del>PG</del> PP <del>GP</del> TGA                                                                   |
| mouse_Col4A2 | (646) | GP <del>PG</del> TPGQR <del>DC</del> DTG <del>VKR</del> PI <del>GG</del> GQ <del>VVV</del> Q <del>PG</del> CI <del>EG</del> PT <del>GS</del> PG <del>Q</del> PP <del>GP</del> TGA                                            |
|              |       | 701 750                                                                                                                                                                                                                      |
| human_Col4A2 | (701) | KGLRGI <del>PG</del> FAGADGG <del>PG</del> PR <del>GL</del> PGDAG <del>REG</del> FP <del>GG</del> PGFI <del>GPR</del> GSKGAV <del>GL</del> PG                                                                                |
| mouse_Col4A2 | (696) | KGV <del>RG</del> MPGF <del>PG</del> AS <del>GE</del> QL <del>GK</del> GF <del>PG</del> D <del>PG</del> REG <del>FP</del> GG <del>PM</del> GPRGSKGTT <del>GL</del> PG                                                        |
|              |       | 751 800                                                                                                                                                                                                                      |
| human_Col4A2 | (751) | PDGSPGI <del>GL</del> PG <del>D</del> GG <del>PE</del> RG <del>LPE</del> VLGA <del>Q</del> PG <del>PR</del> DAG <del>VPG</del> Q <del>PL</del> K <del>GL</del> PG                                                            |
| mouse_Col4A2 | (746) | PDGPPGI <del>GL</del> PG <del>A</del> GG <del>PD</del> RG <del>IP</del> GE <del>VL</del> GA <del>Q</del> PG <del>TR</del> DAG <del>LPG</del> Q <del>PL</del> K <del>GL</del> PG                                              |
|              |       | 801 850                                                                                                                                                                                                                      |
| human_Col4A2 | (801) | DRGPPGFRGSQ <del>GM</del> PG <del>MP</del> GL <del>KG</del> Q <del>PGL</del> PG <del>PS</del> Q <del>PG</del> LY <del>GG</del> PP <del>LHG</del> FP <del>GA</del> PG <del>QE</del>                                           |
| mouse_Col4A2 | (796) | ETGAPGFRGSQ <del>GM</del> PG <del>MP</del> GL <del>KG</del> Q <del>PGF</del> PG <del>PS</del> Q <del>PG</del> QS <del>GG</del> PP <del>QH</del> GF <del>PG</del> T <del>PGRE</del>                                           |
|              |       | 851 900                                                                                                                                                                                                                      |
| human_Col4A2 | (851) | G <del>PL</del> GL <del>PGI</del> PG <del>RE</del> GL <del>PG</del> DR <del>DP</del> GD <del>TG</del> AP <del>GP</del> V <del>GM</del> K <del>GLS</del> GD <del>RG</del> DAG <del>FT</del> GE <del>QH</del>                  |
| mouse_Col4A2 | (846) | G <del>PL</del> Q <del>PGS</del> P <del>GL</del> GL <del>PG</del> DR <del>EP</del> GD <del>PG</del> V <del>GP</del> V <del>GM</del> K <del>GLS</del> GD <del>RG</del> DAG <del>MS</del> GER <del>GH</del>                    |
|              |       | 901 950                                                                                                                                                                                                                      |
| human_Col4A2 | (901) | PGSPGF <del>FKG</del> ID <del>GM</del> PGT <del>PL</del> K <del>GD</del> RG <del>SP</del> GM <del>DG</del> F <del>QG</del> MP <del>GL</del> K <del>GR</del> PF <del>FG</del> SK <del>GE</del> AG                             |
| mouse_Col4A2 | (896) | PGSPGF <del>FKG</del> MAG <del>MP</del> GI <del>PG</del> Q <del>K</del> GD <del>RG</del> SP <del>GM</del> D <del>G</del> F <del>QG</del> ML <del>GL</del> K <del>GR</del> Q <del>GF</del> PG <del>T</del> K <del>GE</del> AG |

|              |        |       |             |                                                 |
|--------------|--------|-------|-------------|-------------------------------------------------|
|              |        | 951   |             | 1000                                            |
| human_Col4A2 | (951)  | FFG   | I           | PGLKGLAGEPGFKGSRGDPGPPGPPPVILPGMKDIKGEKGDDEGPMG |
| mouse_Col4A2 | (946)  | FFG   | V           | PGLKGLPGEPEVKGNRGRGPPGPPPLILPGMKDIKGEKGDDEGPMG  |
|              |        | 1001  |             | 1050                                            |
| human_Col4A2 | (1001) | LKGYL | GAKGIQGMPI  | PGLSGI                                          |
| mouse_Col4A2 | (996)  | LKGYL | LGLKGIQGMPI | PGLSGI                                          |
|              |        | 1051  |             | 1100                                            |
| human_Col4A2 | (1051) | PGV   | A           | GPPGITGFP                                       |
| mouse_Col4A2 | (1046) | PGV   | S           | GPPGITGFP                                       |
|              |        | 1101  |             | 1150                                            |
| human_Col4A2 | (1101) | GRP   | L           | KGERGT                                          |
| mouse_Col4A2 | (1096) | GSP   | L           | KGERGT                                          |
|              |        | 1151  |             | 1200                                            |
| human_Col4A2 | (1151) | TGF   | P           | LTPG                                            |
| mouse_Col4A2 | (1146) | TGF   | P           | LTPG                                            |
|              |        | 1201  |             | 1250                                            |
| human_Col4A2 | (1201) | LP    | G           | TG                                              |
| mouse_Col4A2 | (1196) | LP    | G           | TG                                              |
|              |        | 1251  |             | 1300                                            |
| human_Col4A2 | (1251) | GAP   | G           | ERG                                             |
| mouse_Col4A2 | (1246) | GTP   | G           | ERG                                             |
|              |        | 1301  |             | 1350                                            |
| human_Col4A2 | (1301) | PG    | S           | AAL                                             |
| mouse_Col4A2 | (1296) | PG    | P           | NAL                                             |
|              |        | 1351  |             | 1400                                            |
| human_Col4A2 | (1351) | EQ    | F           | M                                               |
| mouse_Col4A2 | (1346) | EQ    | F           | M                                               |
|              |        | 1401  |             | 1450                                            |
| human_Col4A2 | (1401) | PG    | T           | V                                               |
| mouse_Col4A2 | (1396) | PG    | T           | V                                               |
|              |        | 1451  |             | 1500                                            |
| human_Col4A2 | (1451) | FR    | G           | D                                               |
| mouse_Col4A2 | (1446) | FR    | G           | D                                               |
|              |        | 1501  |             | 1550                                            |
| human_Col4A2 | (1501) | EP    | M           | C                                               |
| mouse_Col4A2 | (1496) | EP    | M           | C                                               |
|              |        | 1551  |             | 1600                                            |
| human_Col4A2 | (1551) | PG    | D           | V                                               |
| mouse_Col4A2 | (1546) | PG    | D           | V                                               |
|              |        | 1601  |             | 1650                                            |
| human_Col4A2 | (1601) | AV    | H           | S                                               |
| mouse_Col4A2 | (1596) | AV    | H           | S                                               |
|              |        | 1651  |             | 1700                                            |
| human_Col4A2 | (1651) | RAT   | P           | F                                               |
| mouse_Col4A2 | (1646) | RAT   | P           | F                                               |
|              |        | 1701  |             | 1712                                            |
| human_Col4A2 | (1701) | HIS   | R           | C                                               |
| mouse_Col4A2 | (1696) | HIS   | R           | C                                               |

**Supplemental Figure 5.** Sequence alignment of mouse and human Type IV collagen  $\alpha 2$  chain. X-position prolines predicted to be 3-hydroxylated in mouse, based on the mass spectrometry data reported here, are highlighted in blue. Sequences with identity between mouse and human are highlighted in yellow. Similar amino acids (i.e. I/L, T/S) are highlighted in green.

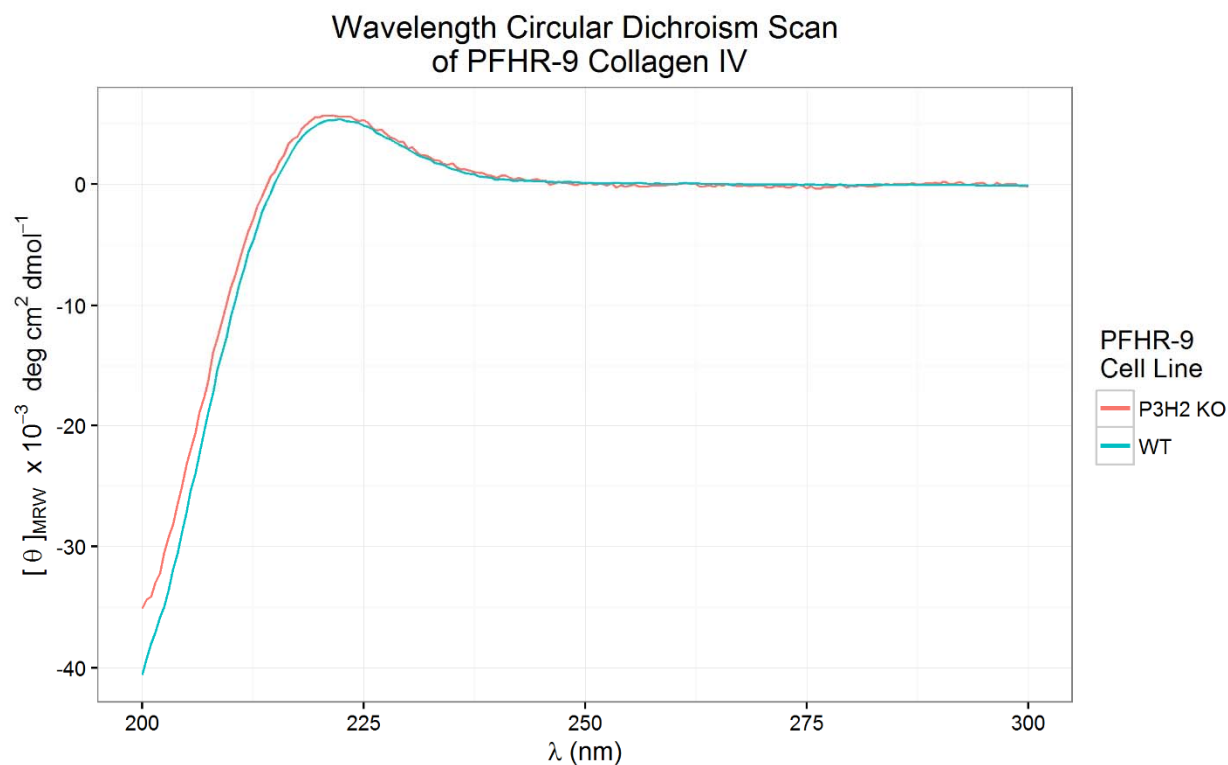

**Supplemental Figure 6.** *Wavelength Scan comparison of wt and P3H2 ko (6A6) PFHR-9 Circular Dichroism Spectra.* Circular dichroism signal is normalized by concentration to molar ellipticity with standard units and are shown on the y-axis. Wavelength scans were acquired at 25 °C from 200 to 300 nm in 0.5 nm steps with 60 second signal averaging per scan. Baseline was set by averaging signal over the range from 240 to 300 nm for each scan. The curve for P3H2 ko type IV collagen scans is shown in red, while the curve for the wt scans is shown in blue.

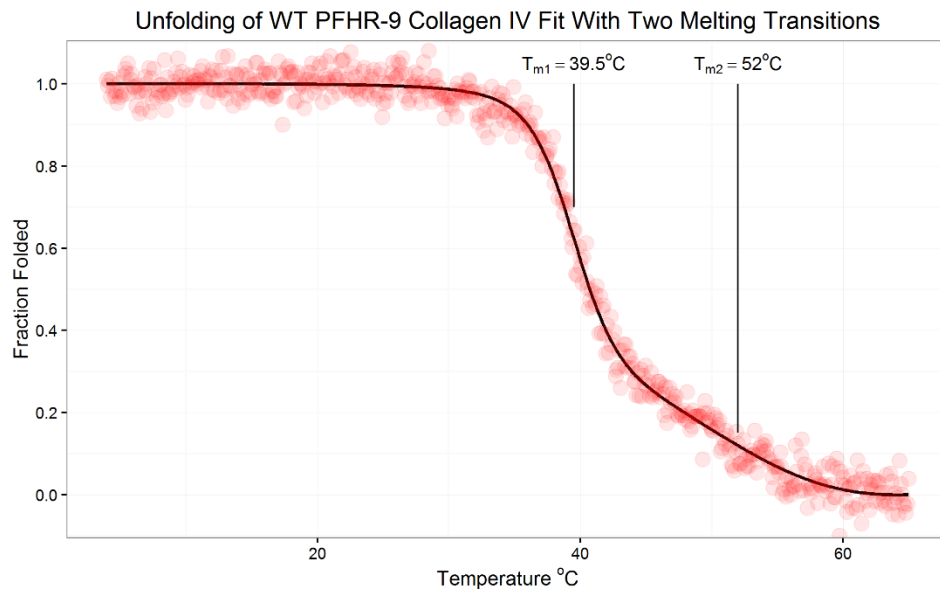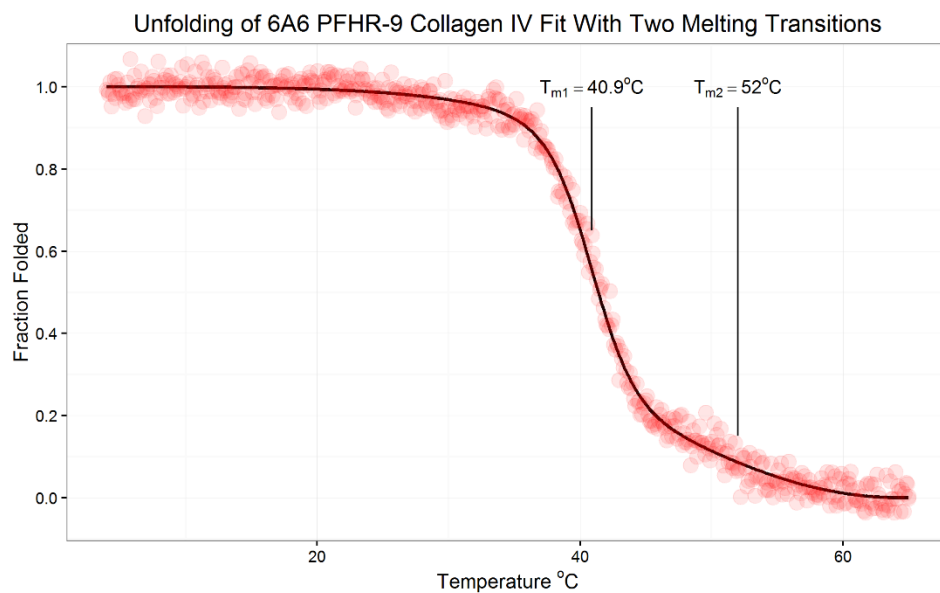

**Supplemental Figure 7.** Comparison of wt (a.) and PFHR-9 P3H2 ko (b.) type IV collagen melting transition. Unfolding curves were modeled using two-transition model with the indicated melting temperatures as input parameters. Data points are shown as red dots, fit as a black line. Absolute CD signal was transformed to fraction of folded collagen IV using a relation found in the methods section of (1).

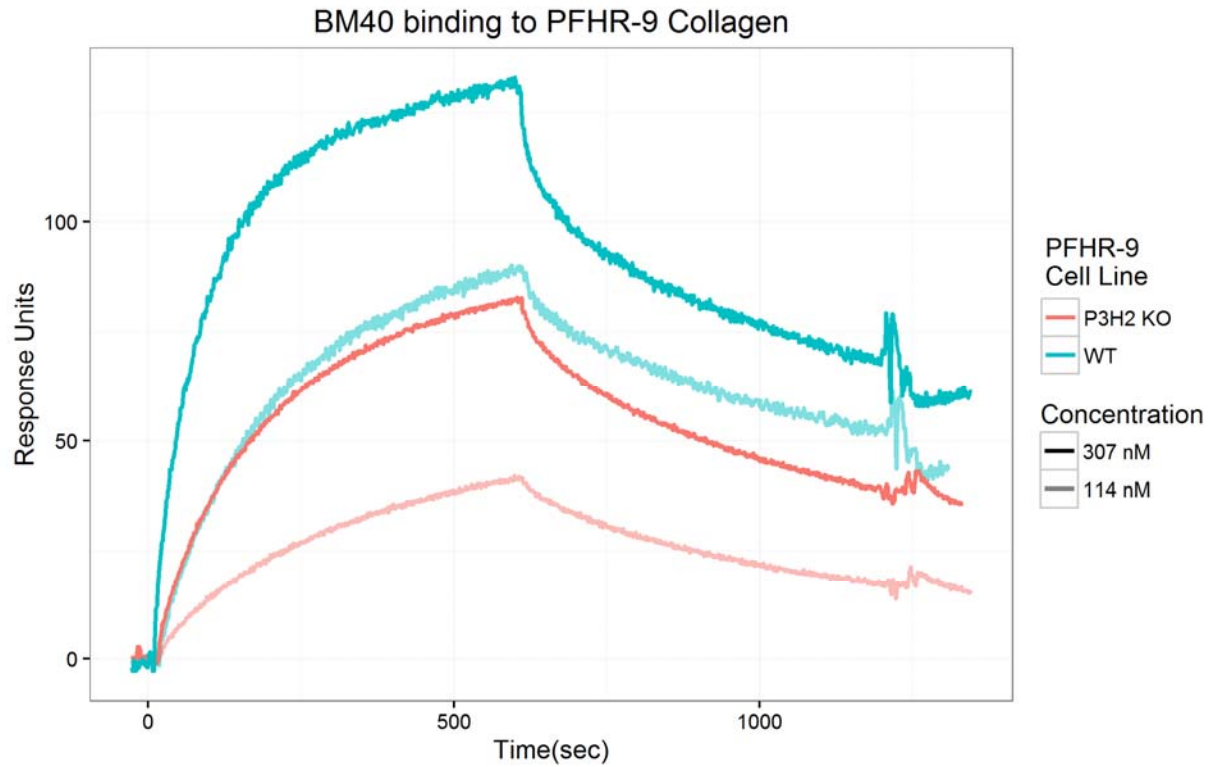

**Supplemental Figure 8.** *Surface Plasmon Resonance Binding of SPARC with Truncation of Inhibitory Domains (BM40- $\Delta I-\alpha C$ ) to type IV collagen from wt or P3H2 ko PFHR-9 cells.* Injection was from 0 to 600 seconds, dissociation was from 600 to 1200 seconds. Lighter curve for each experiment indicates a lower concentration (307 vs 114 nM) Each curve is from an average of 3 injections. Response was normalized for the amount of bound collagen IV.

**Supplemental Figures 9–40.** *Mass Spectra of Diverse type IV collagen Peptides.* See Table 2 for correspondence between Supplemental Figure #, and the relevant site of modification. Top Panels: MS<sup>1</sup> spectra for each peptide. Peaks are labeled to indicate the number of 4-Hyp present, methionine sulfoxide if present, and 3-Hyp together with the residue number containing the putative modification. The sequence of the putative peptide is shown above the spectrum, with residues underlined to indicate oxidation to 4-Hyp, 3-Hyp or methionine sulfoxide, and residues are numbered to indicate modified residues of special interest, including all of the 3-Hyp modifiable residues. Lysine residues modified to galactosylhydroxylysine are also indicated with an -Gal or indicated for glucosylgalactosylhydroxylysine with an adjacent -GluGal. C-terminal methionine residues are present in CNBr digested peptides, where they are modified to homoserine lactone (mass shift = -31 Da) unless otherwise indicated. Bottom Panels: MS<sup>2</sup> spectra for each observed peptide. The predicted b- and y-ions are annotated within the spectrum with their mass and charge state. Multiple related spectra which are differently modified but with the same amino acid sequence are vertically stacked, to easily compare mass differences arising from differential modification. The amino acid sequence is shown above each spectrum, with residue letters separated by lines that indicate the location of b- or y-ion related fragmentation events.

Supplemental Figure 9.

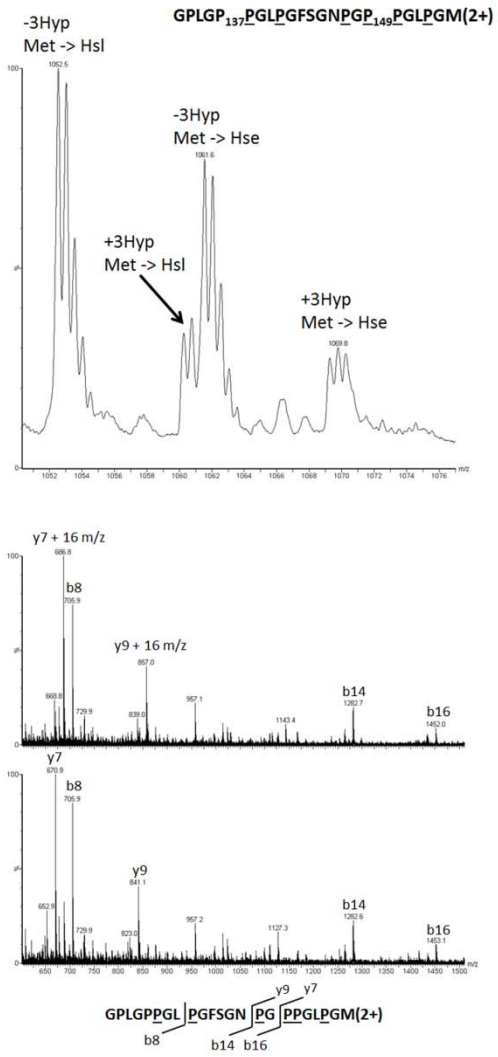

Supplemental Figure 10.

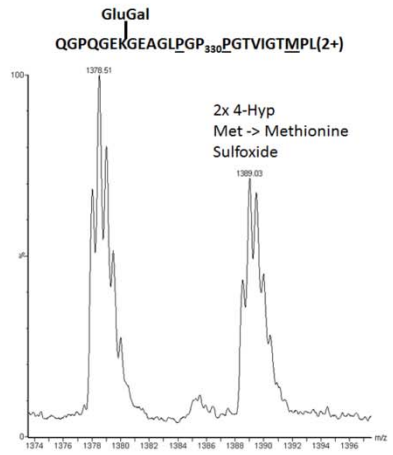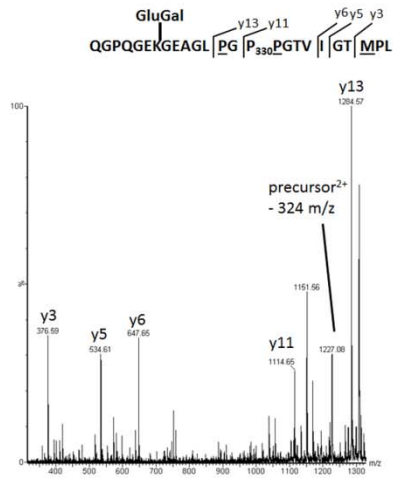



Supplemental Figure 11.

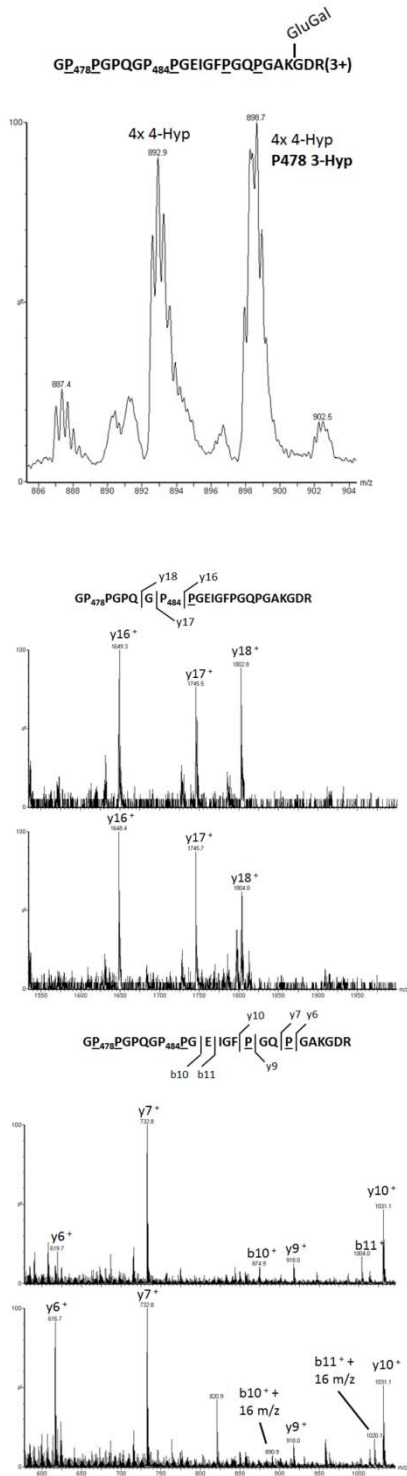

Supplemental Figure 12.

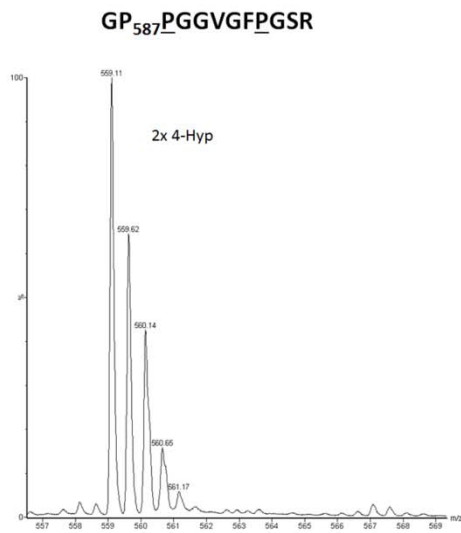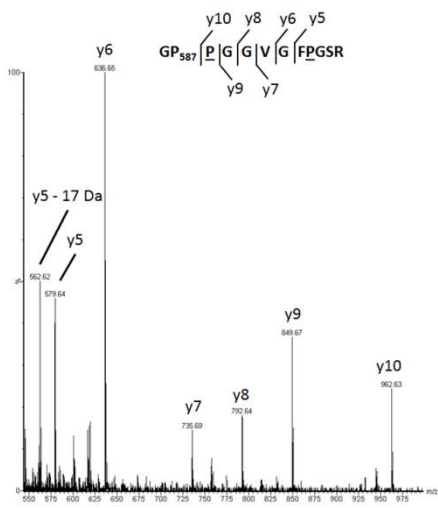

Supplemental Figure 13.

VVPLPGP<sub>647</sub>PGAAGLPGSPGFPGPQGDR(2+)

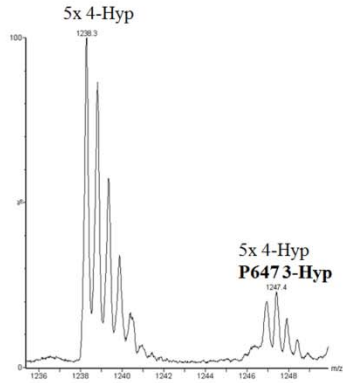

VV|PL|PG|P<sub>647</sub>|PGAAGL|PGS|PGF|PGPQGDR

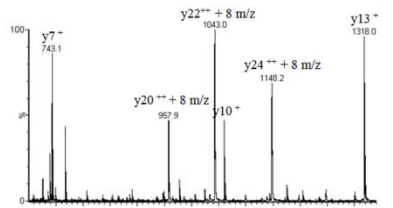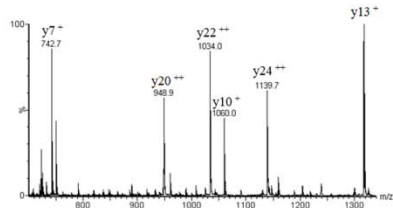

VVPLPGP<sub>647</sub>PG|A|AGLPGSPGFPGPQGDR

y19 y17

y18 y16

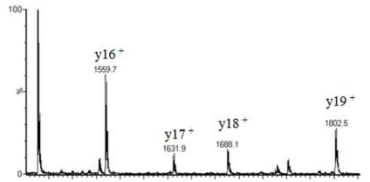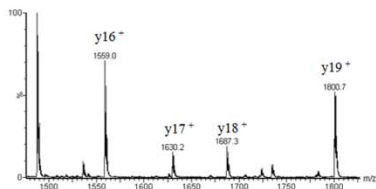

Supplemental Figure 14.

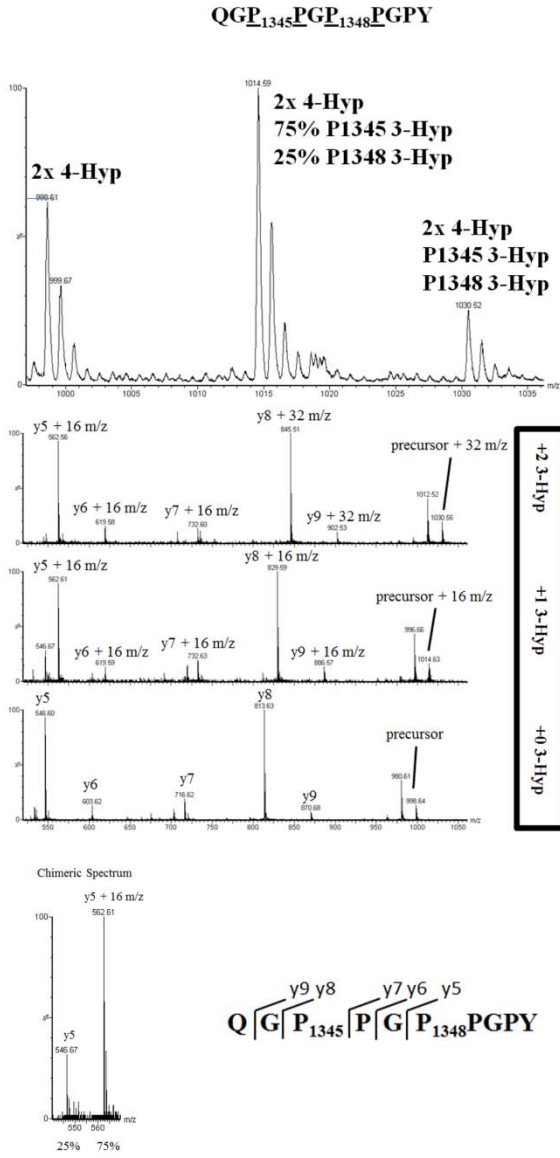

Supplemental Figure 15.

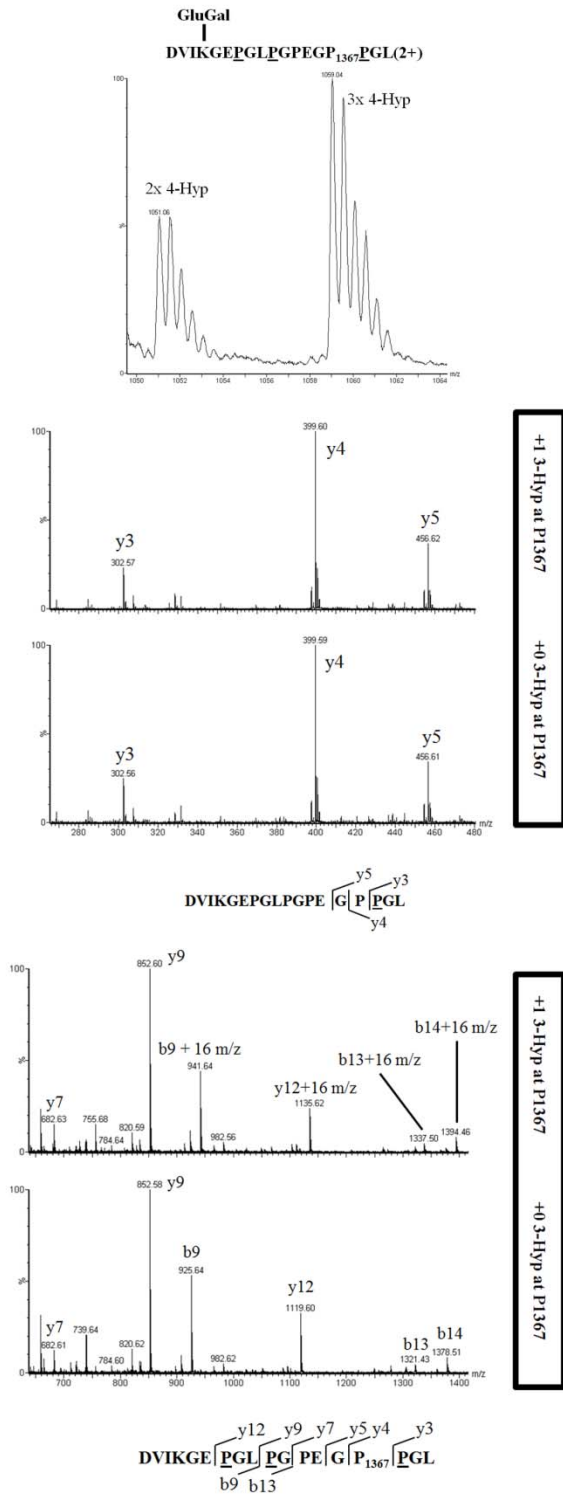

Supplemental Figure 16a.

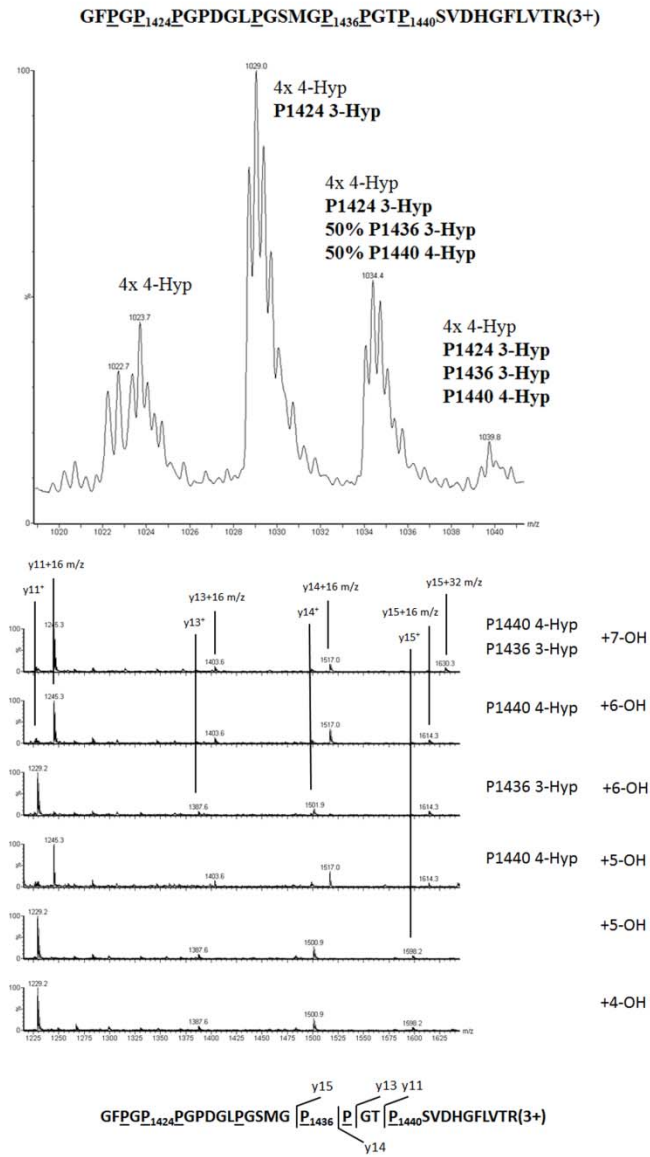

Supplemental Figure 16b.

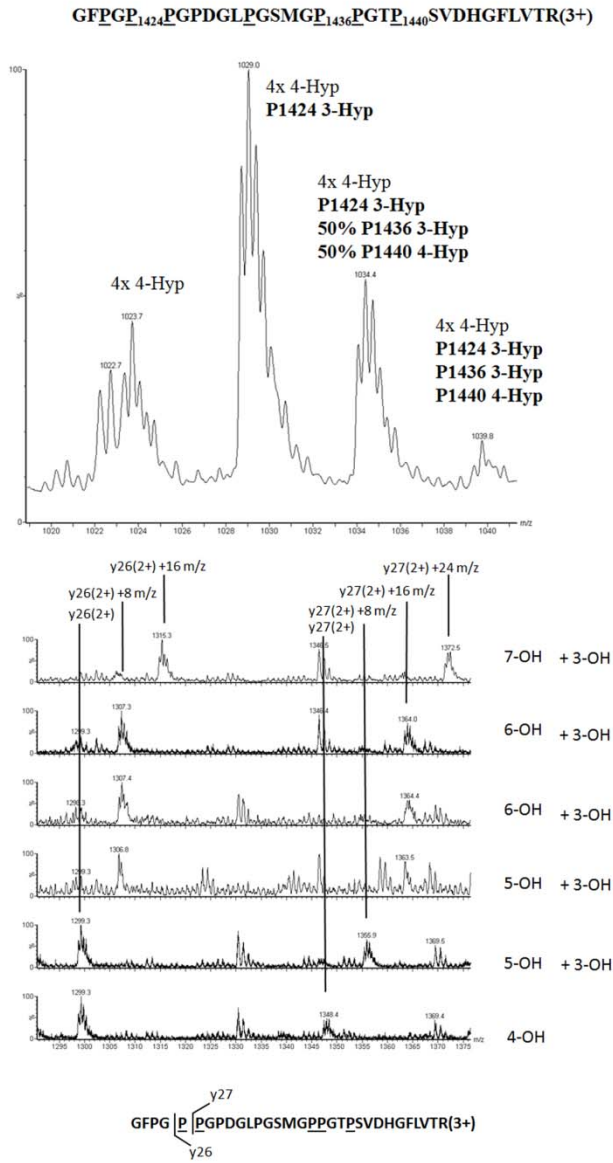

Supplemental Figure 17.

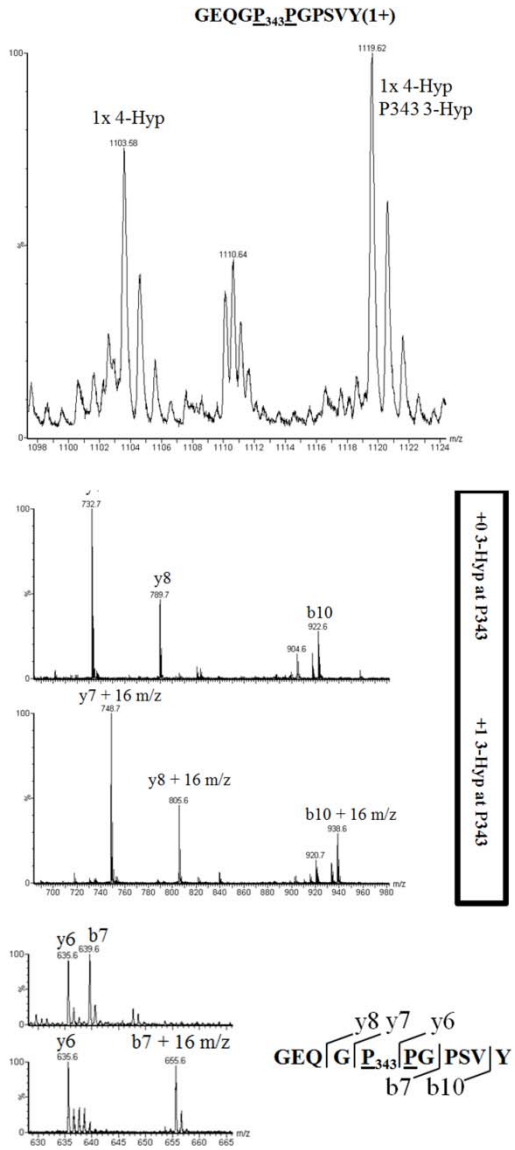



Supplemental Figure 18.

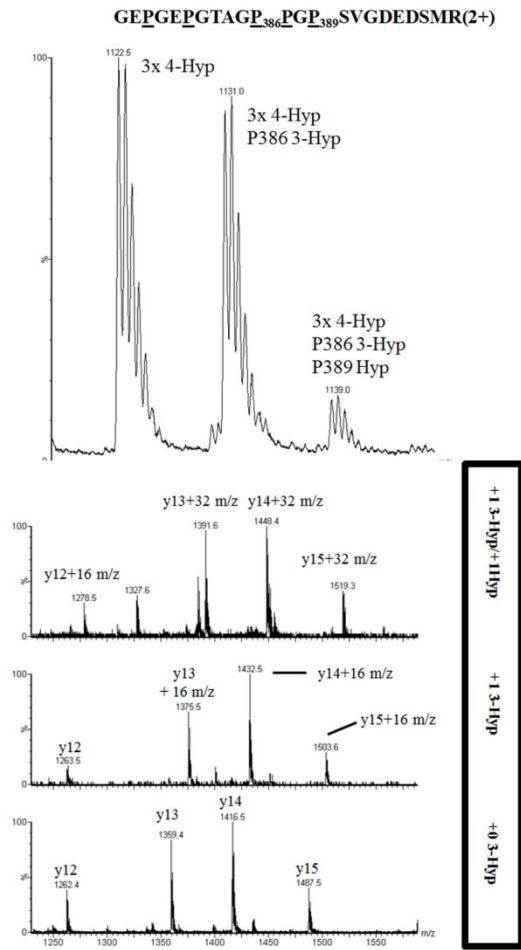

Supplemental Figure 19.

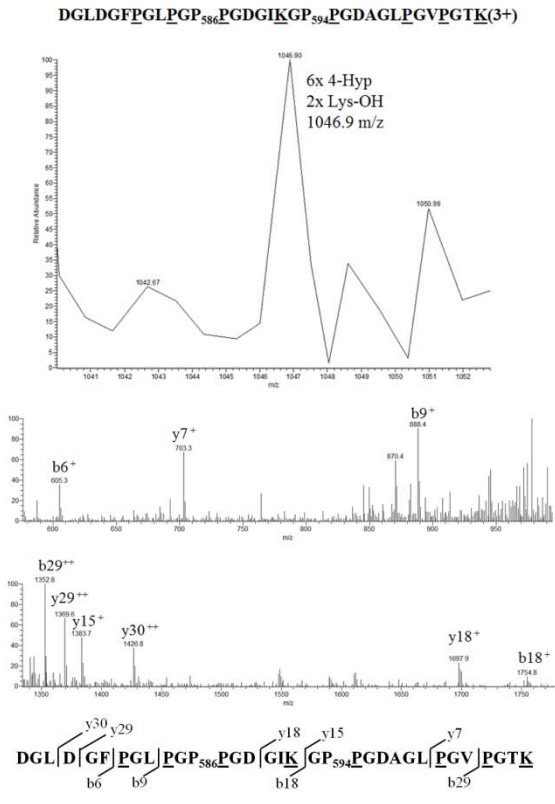

Supplemental Figure 20

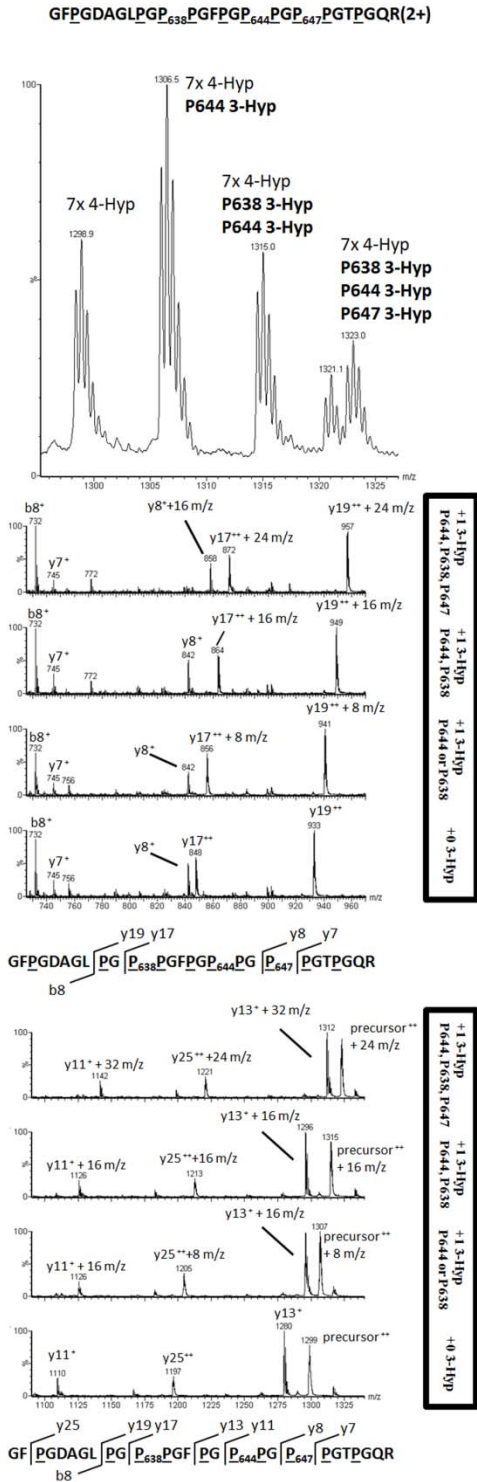

Supplemental Figure 21.

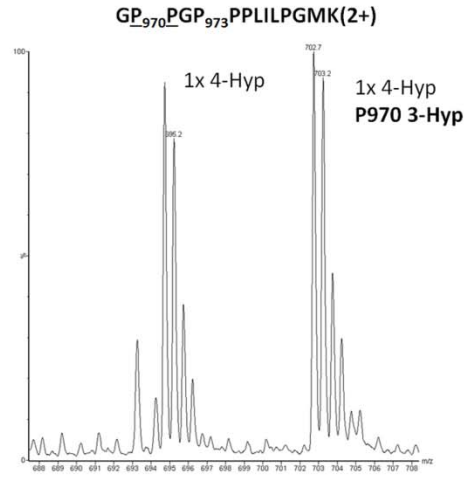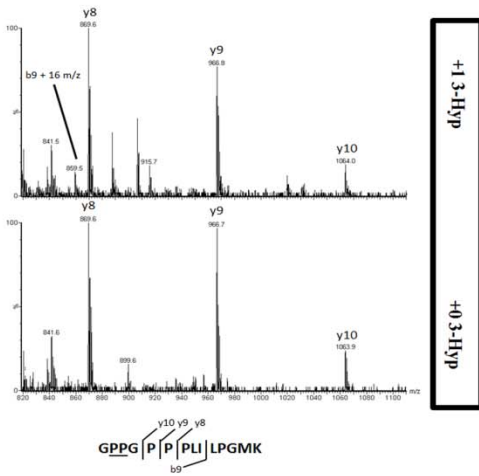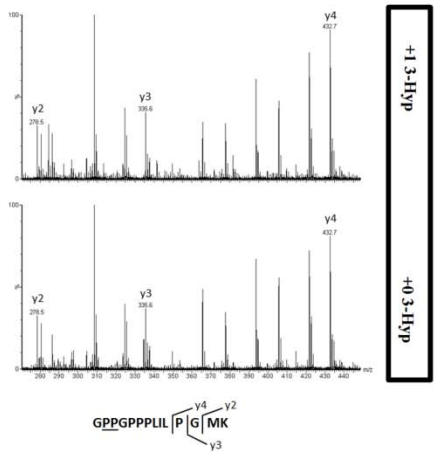

Supplemental Figure 22.

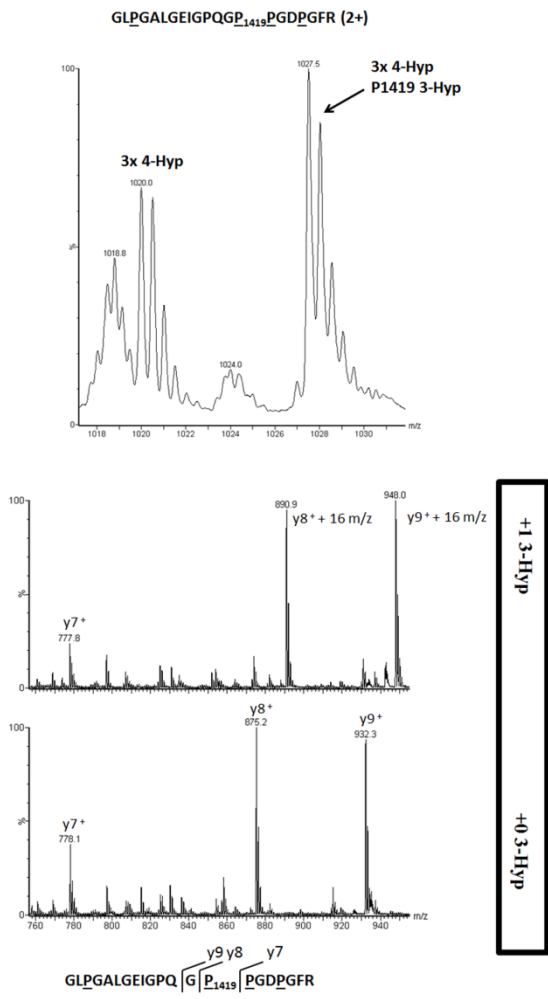

Supplemental Figure 23.

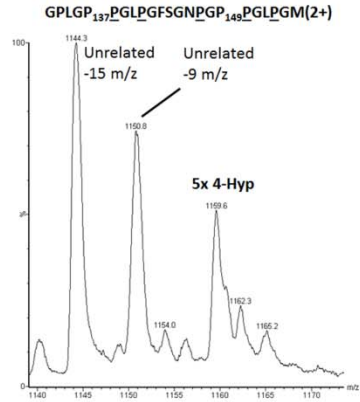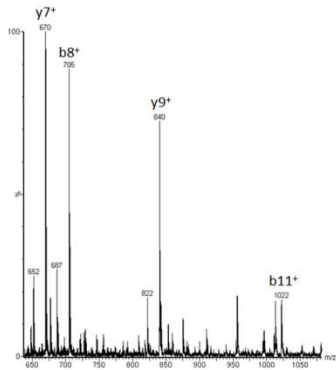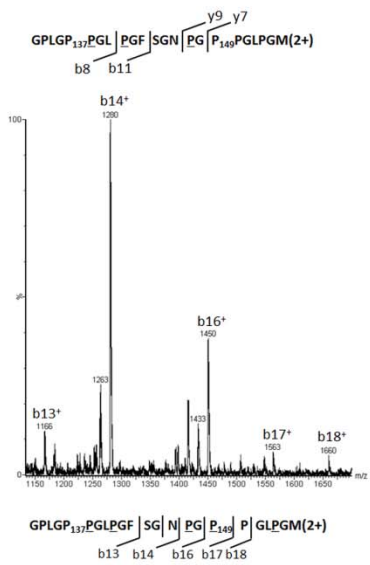

Supplemental Figure 24.

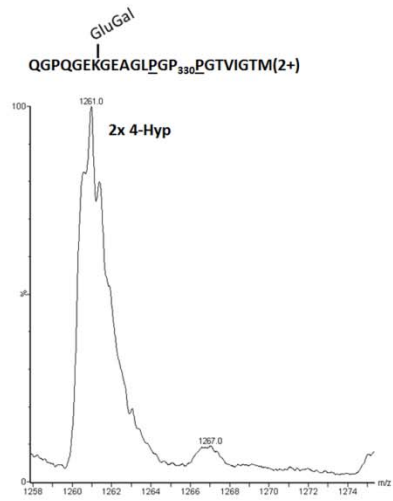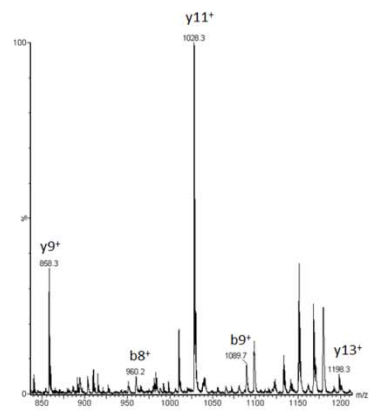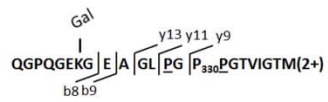

Note: Glu-Gal bond cleaved during MS analysis.  
 B-ion shown above includes K-Gal

Supplemental Figure 25.

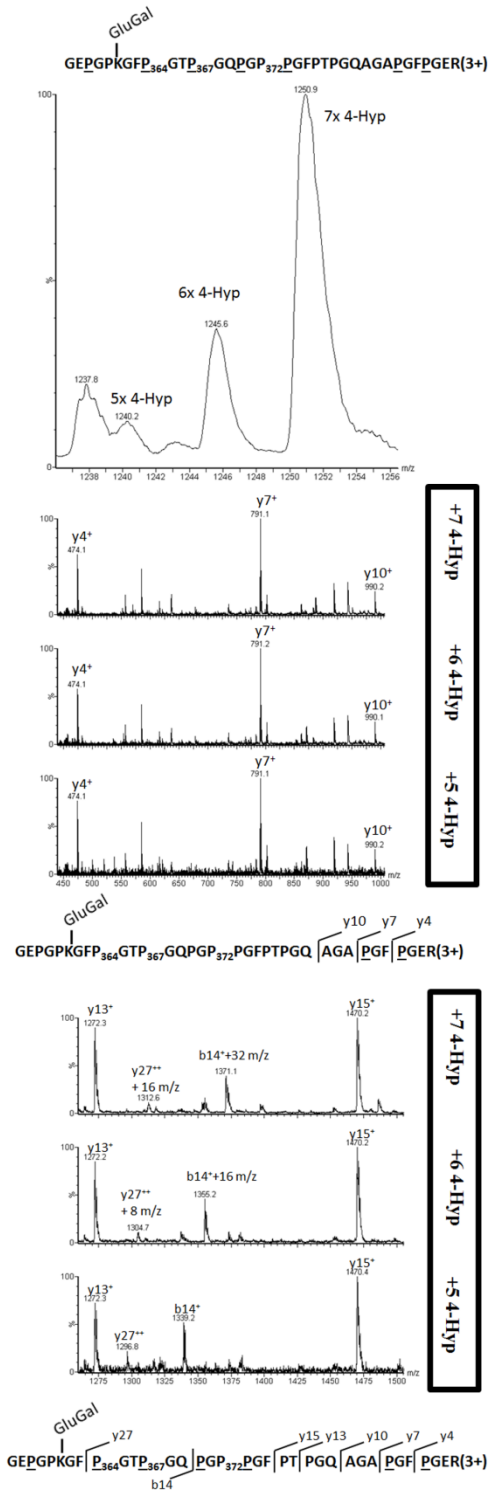



Supplemental Figure 26

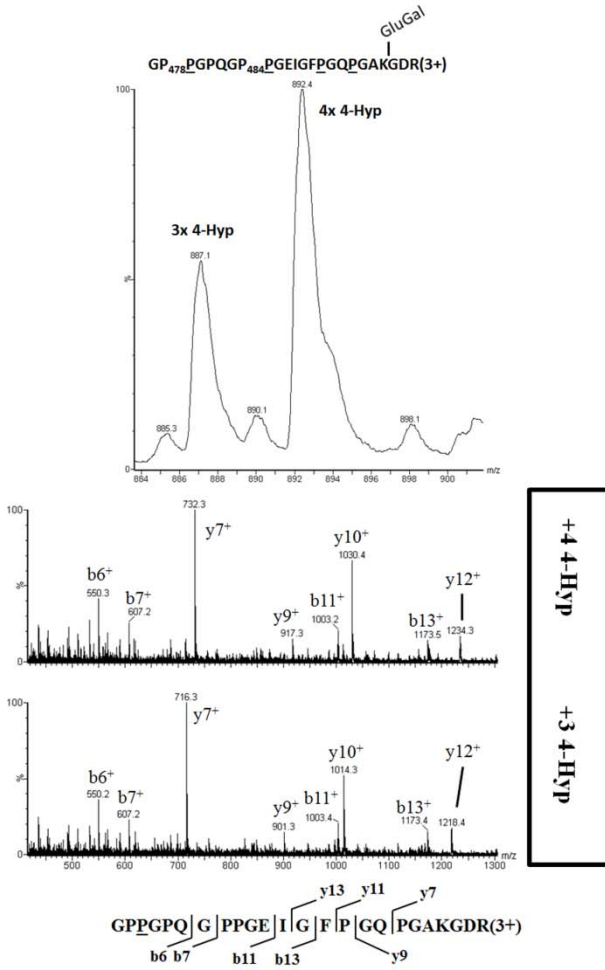

Supplemental Figure 27.

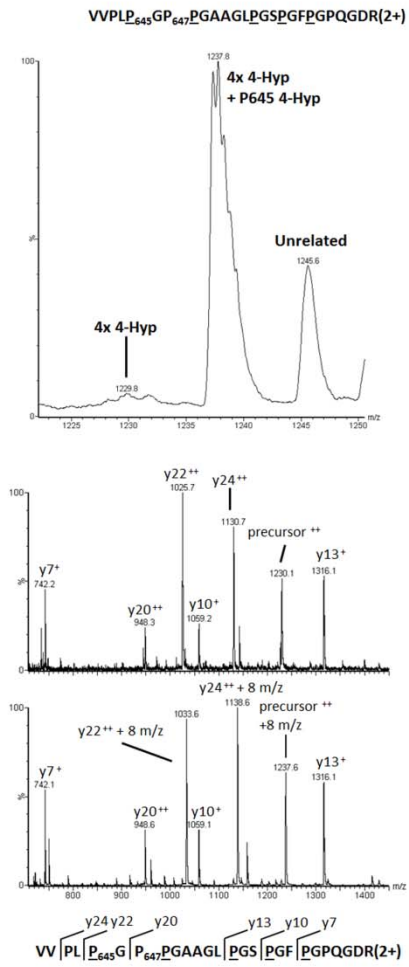

Supplemental Figure 28.

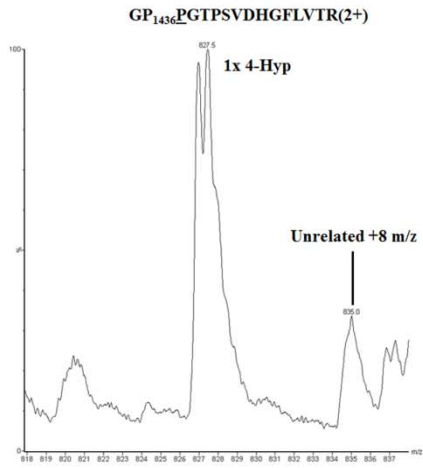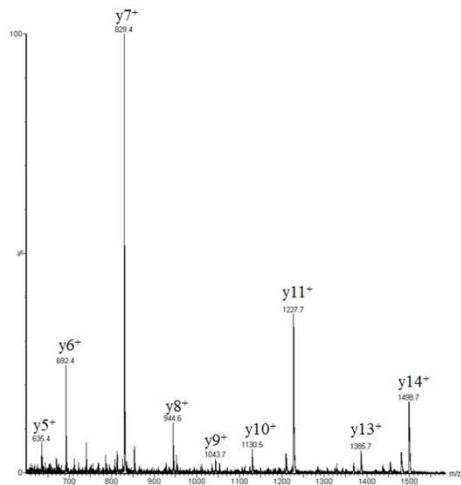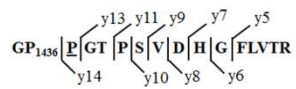

Supplemental Figure 29.

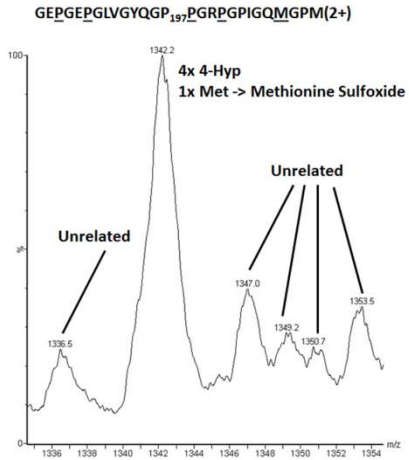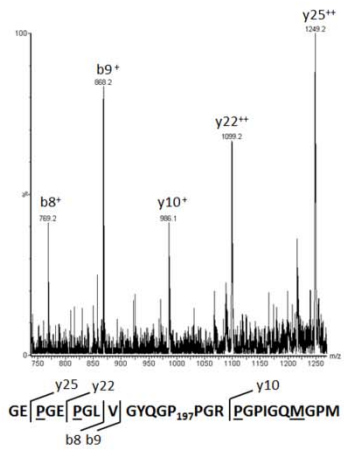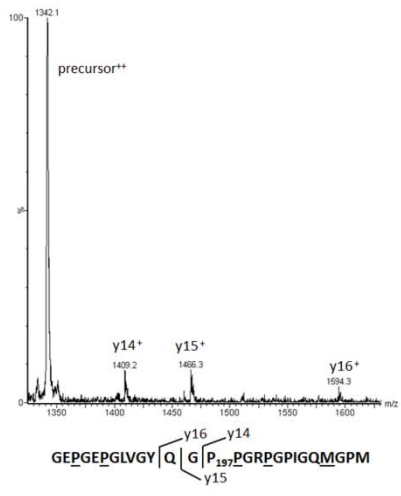

Supplemental Figure 30.

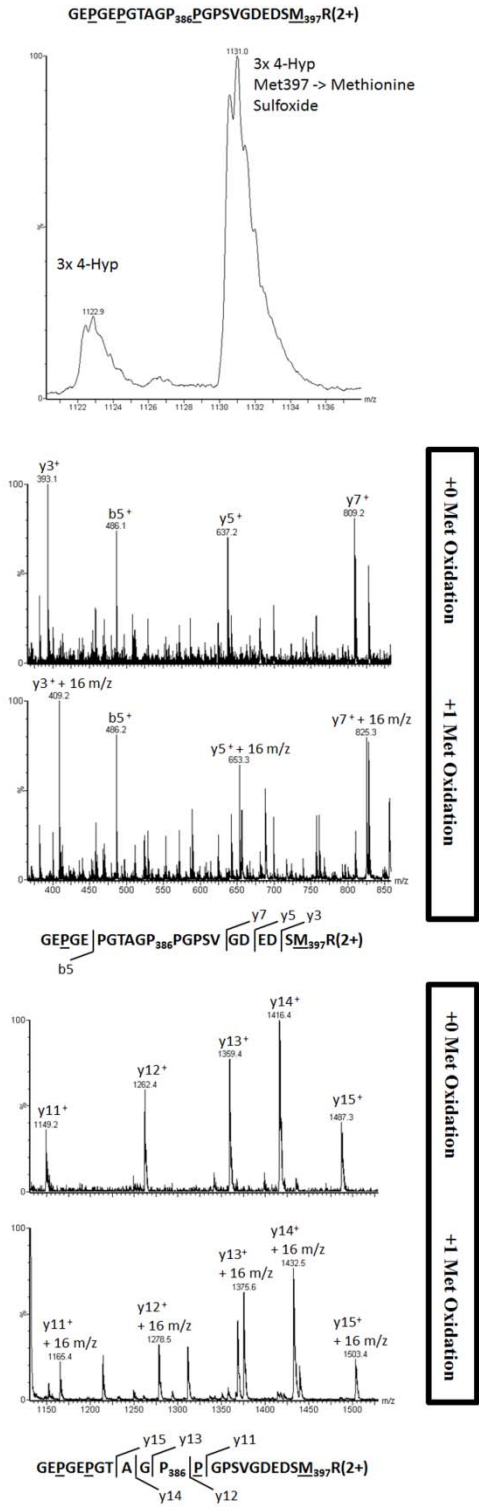

+0 Met Oxidation  
+1 Met Oxidation

+0 Met Oxidation  
+1 Met Oxidation

Supplemental Figure 31.

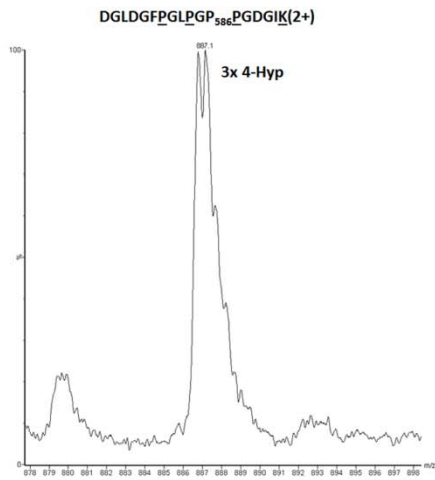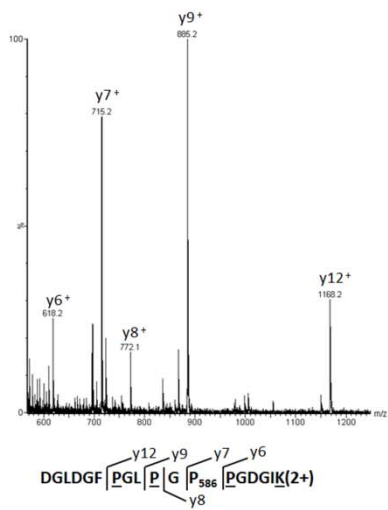

Supplemental Figure 32.

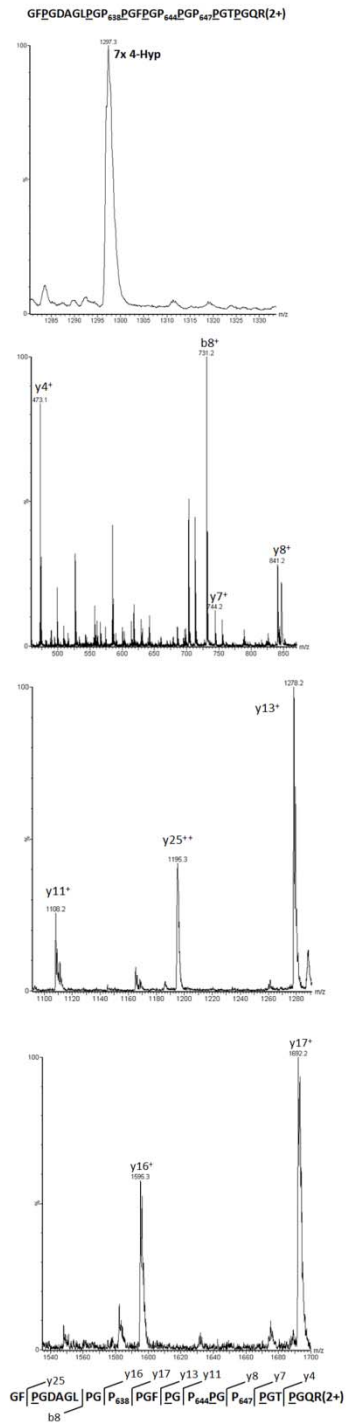

Supplemental Figure 33.

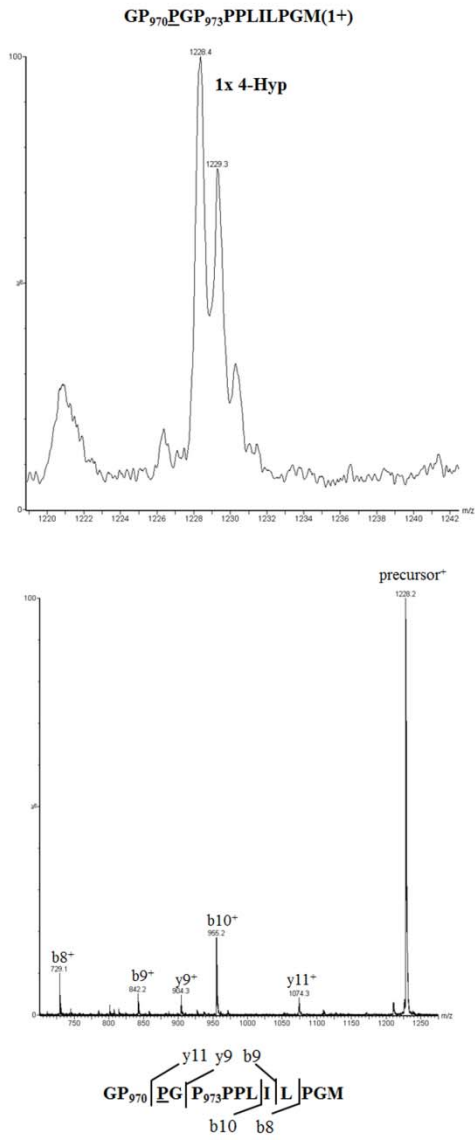



Supplemental Figure 34.

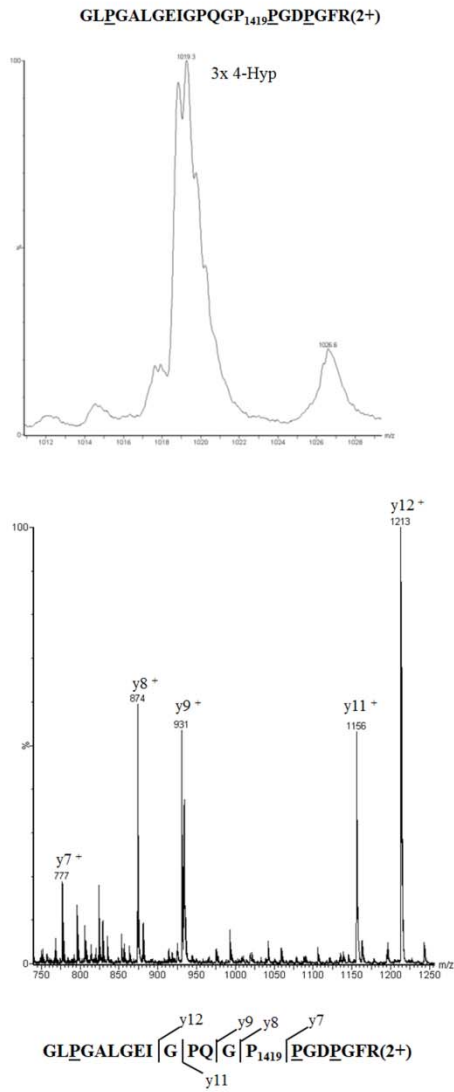

Supplemental Figure 35.

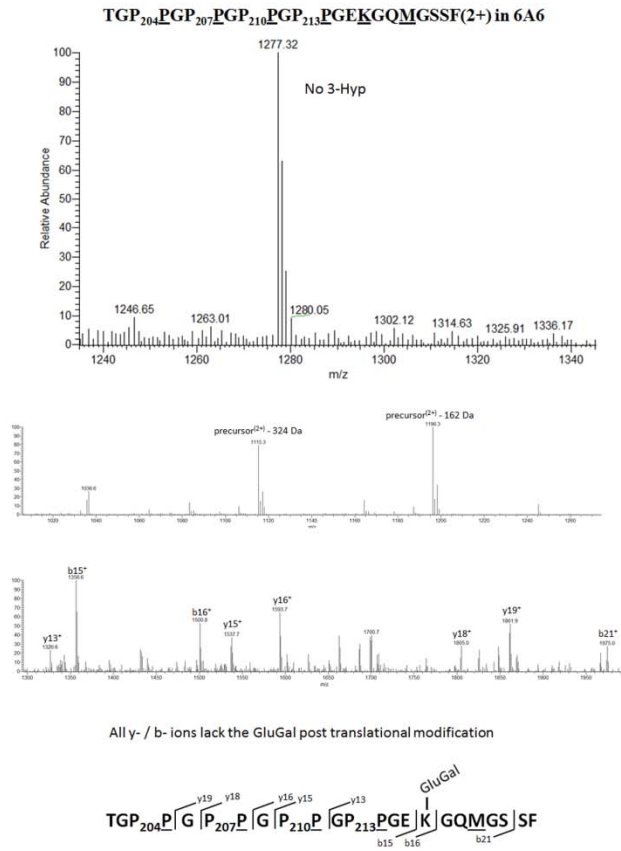

Supplemental Figure 36a

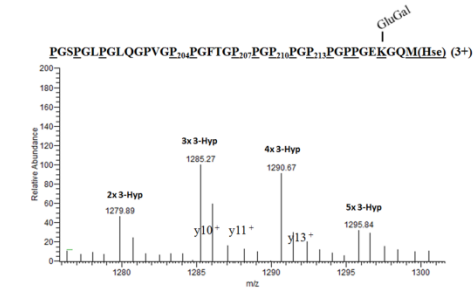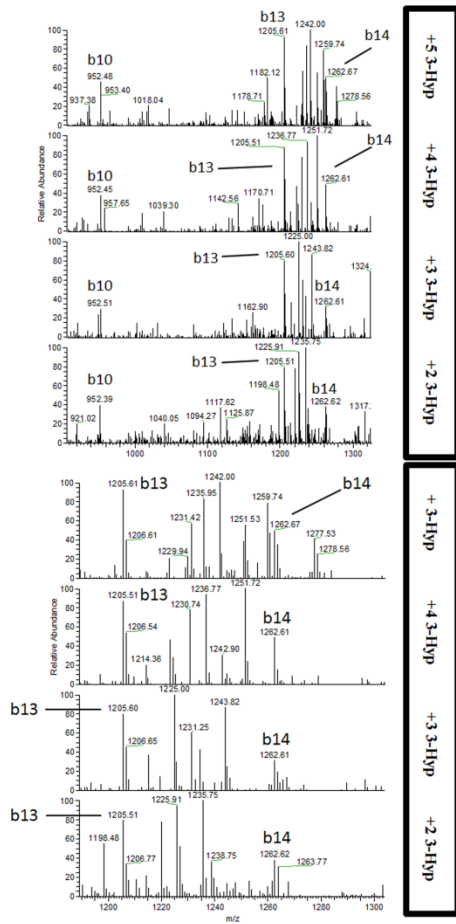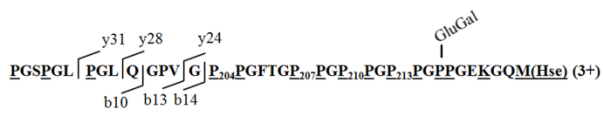

Supplemental Figure 36b

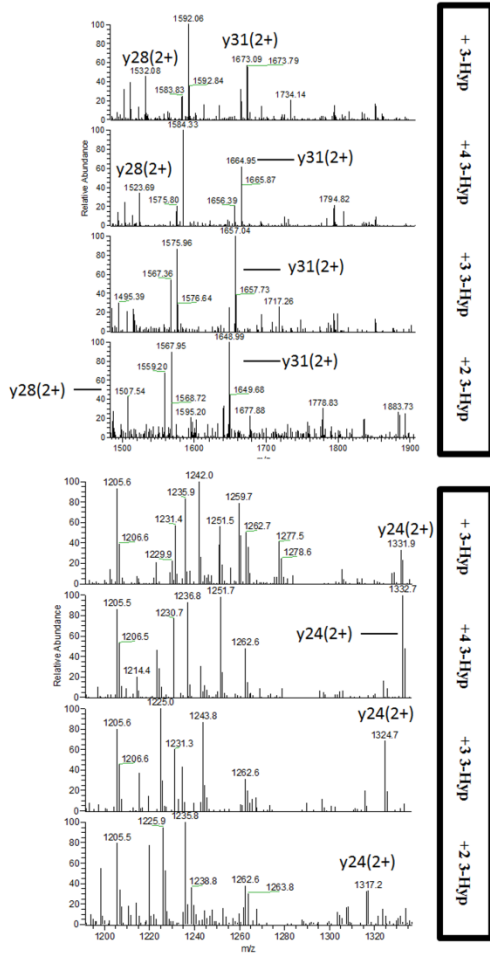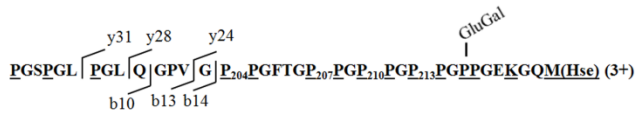

Supplemental Figure 37

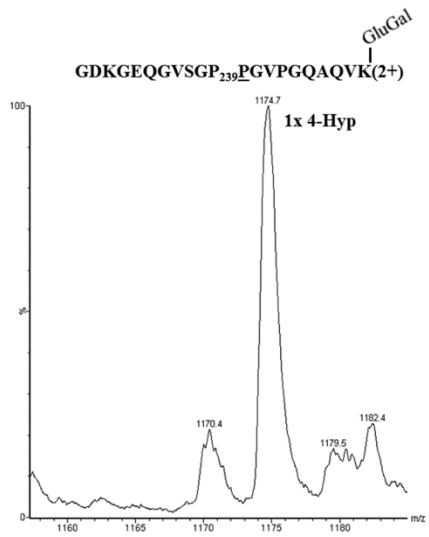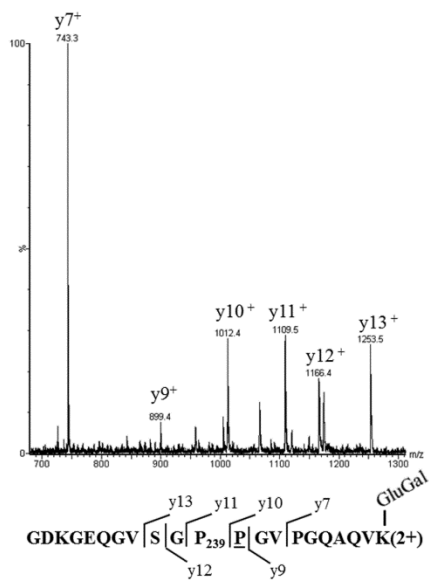

Supplemental Figure 38

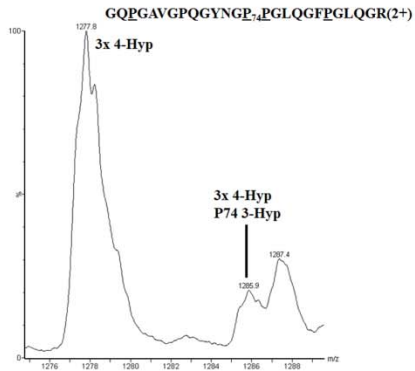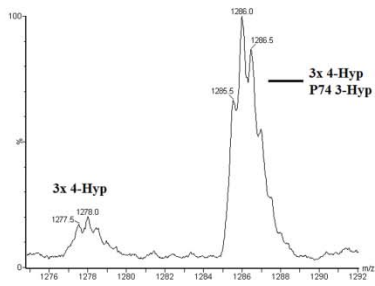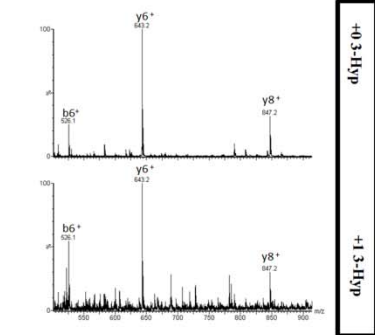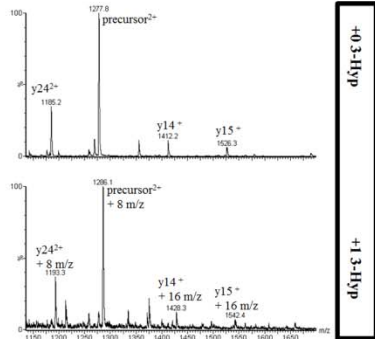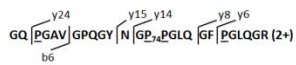

Supplemental Figure 39

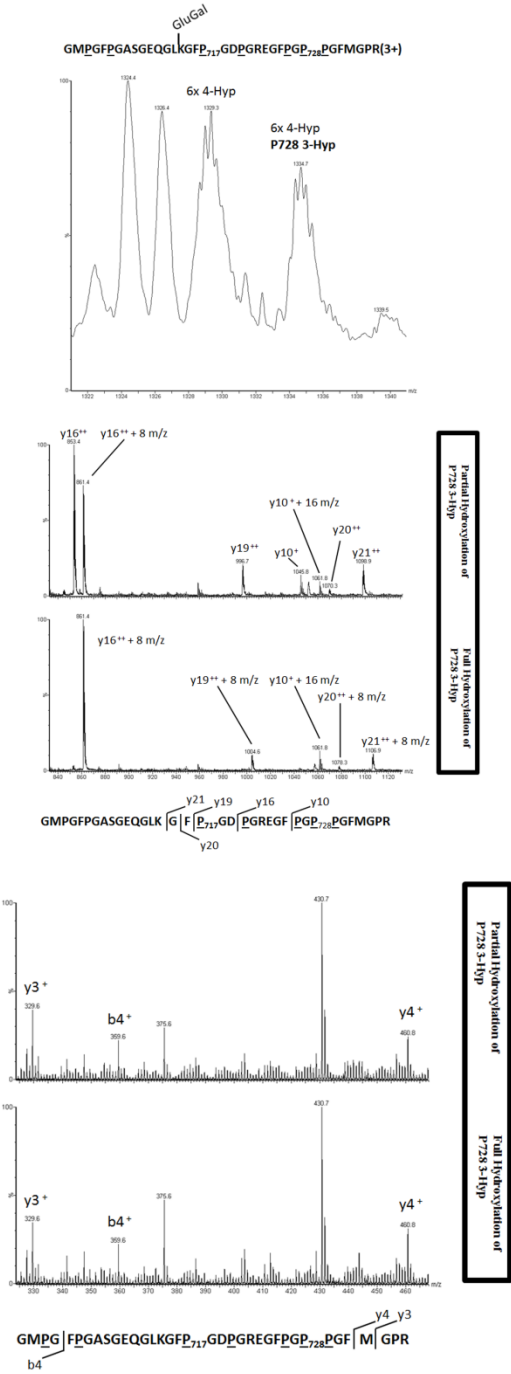

Supplemental Figure 40

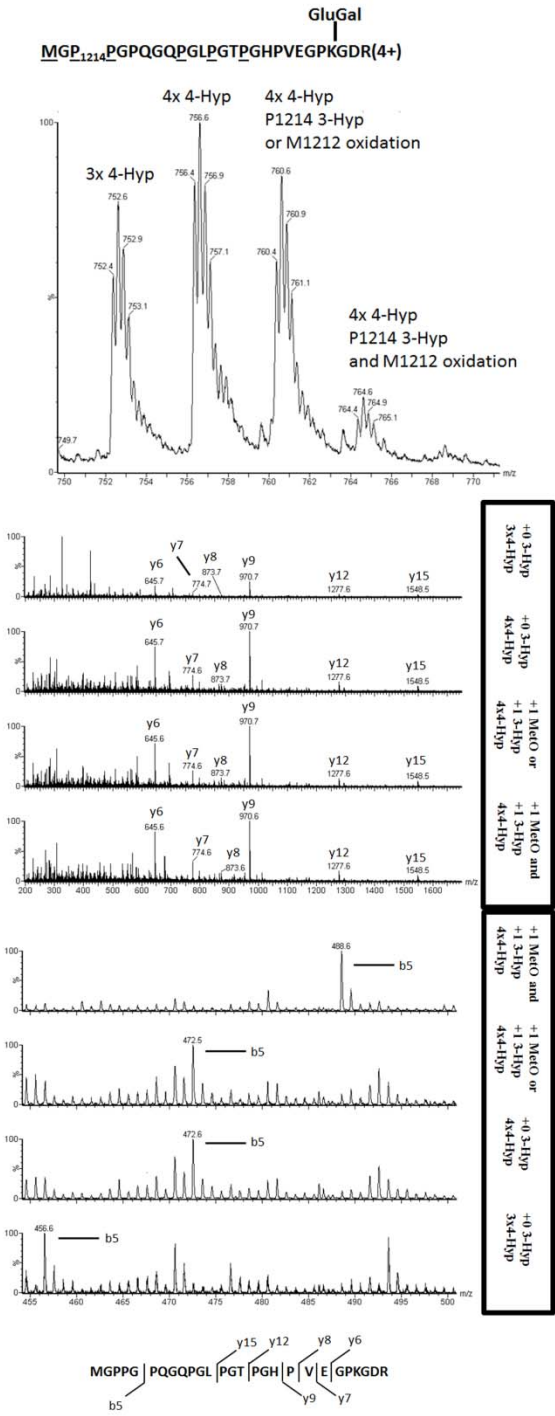



## References

1. Persikov, A.V., Y. Xu, and B. Brodsky, (2004) *Equilibrium thermal transitions of collagen model peptides*. Protein Sci. **13**(4): p. 893-902.
